# Supplementary material for: Characterizing the Smell of Marijuana by Odor Impact of Volatile Compounds: An Application of Simultaneous Chemical and Sensory Analysis
Source: PubMed Central journal article supplement (PMC4684335; doi:10.1371/journal.pone.0144160), 2015-12-10
Supplement: pone.0144160.s006.pdf [file pone.0144160.s006.pdf]

**Table S1. Legal cases based on probable cause for search and seizure.**

| <b>Legal Case</b>                                           | <b>Ruling</b>                                                                                                                                                         |
|-------------------------------------------------------------|-----------------------------------------------------------------------------------------------------------------------------------------------------------------------|
| Payton v. New York, 445 U.S. 573 (1980)                     | A warrantless search <b>inside your home</b> is reasonable if there is <i>probable cause</i> or exigent circumstances                                                 |
| Maryland v. Macon, 472 U.S. 463 (1985)                      | A warrantless search <b>inside your home</b> is reasonable if items are in plain view                                                                                 |
| Davis v. United States, 328 U.S. 582 (1946)                 | A warrantless search <b>inside your home</b> is reasonable if an officer is given consent                                                                             |
| United States v. Robinson, 414 U.S. 218 (1973)              | A warrantless search <b>inside your home</b> is reasonable if the search is incident to a lawful arrest                                                               |
| New Jersey v. TLO, 469, U.S. 325 (1985)                     | A warrantless search of <b>a student</b> under the authority of school officials is reasonable                                                                        |
| Arizona v. Gant, 129 S. Ct. 1710 (2009)                     | A <b>vehicle</b> may be searched in the area where evidence might be found, if there is <i>probable cause</i> of the vehicle containing evidence of criminal activity |
| Illinois v. Cabales, 543 U.S. 405 (2005)                    | A narcotics detection dog may walk around the exterior of the <b>vehicle</b> in a valid traffic stop without reasonable or explainable suspicion                      |
| United States of America v. Harris, 846 F. Supp. 121 (1994) | Police officers used the smell of marijuana as <i>probable cause</i> to search a <b>vehicle</b> only to find cocaine in the car, but no marijuana.                    |
