# Supplementary material for: Characterizing the Smell of Marijuana by Odor Impact of Volatile Compounds: An Application of Simultaneous Chemical and Sensory Analysis
Source: PubMed Central journal article supplement (PMC4684335; doi:10.1371/journal.pone.0144160), 2015-12-10
Supplement: pone.0144160.s007.pdf [file pone.0144160.s007.pdf]

**Table S2. Summary of VOC emitted from marijuana through packaging into headspace and captured by SPME during 5 min, 1h, 68 h static sampling at room temperature.**

| Compound               | CAS       | Ext. Time | Peak # | RT (min) | Models                                  | Net % Match | Published Descriptors       |                                               | Published ODT (ppm)     |                   |                       |          |
|------------------------|-----------|-----------|--------|----------|-----------------------------------------|-------------|-----------------------------|-----------------------------------------------|-------------------------|-------------------|-----------------------|----------|
|                        |           |           |        |          |                                         |             | Flavornet[1]                | TGSC[2]                                       | LRI & Odour Database[3] | Devos, et al. [4] | Surrogate Conc. (PAC) | OAV      |
| Ethylene oxide         | 75-21-8   | 5 min     | 1      | 1.06     | 4: 44 45 132 46                         | 66          |                             |                                               |                         | 8.51E+02          | 1.42E+06              | 1.66E+03 |
|                        |           | 68 h      | 1      | 1.07     | 2: 44 45                                | 66          |                             |                                               |                         | 8.51E+02          | 1.22E+06              | 1.43E+03 |
| 2-nitropropane         | 79-46-9   | 5 min     | 2      | 1.12     | 2: 43 58                                | 72          |                             |                                               |                         | 7.24E+00          | 1.24E+04              | 1.71E+03 |
|                        |           | 1 h       | 1      | 1.12     | 2: 41 43                                | 75          |                             |                                               |                         | 7.24E+00          | 6.30E+03              | 8.69E+02 |
| Isobutane              | 75-28-5   | 1 h       | 2      | 1.23     | 10: 43 42 41 39<br>72 55 50 73 71<br>58 | 84          |                             |                                               |                         | 1.00E+01          | 7.18E+06              | 7.18E+05 |
|                        |           | 68 h      | 2      | 1.24     | 6: 43 42 41 39<br>53 50                 | 85          |                             |                                               |                         | 1.00E+01          | 1.55E+06              | 1.55E+05 |
| Isobutyraldehyde       | 78-84-2   | 5 min     | 3      | 1.23     | 9: 43 42 41 57<br>39 55 51 38 37        | 78          | Pungent, Malt,<br>Green     | Spicy                                         |                         | 4.07E-02          | 1.84E+06              | 4.51E+07 |
| Methyl mercaptan       | 74-93-1   | 68 h      | 3      | 1.27     | 2: 47 48                                | 87          | Sulfur, Gasoline,<br>Garlic | Decomposing,<br>Cabbage,<br>Garlic            |                         |                   | 1.86E+04              |          |
| Acetaldehyde           | 75-07-0   | 68 h      | 4      | 1.28     | 2: 44 43                                | 80          | Pungent, Ether              | Pungent,<br>Ethereal,<br>Aldehydic,<br>Fruity | 1.86E-01                | 2.67E+04          | 1.44E+05              |          |
| Isoprene               | 78-79-5   | 1 h       | 3      | 1.33     | 1: 67                                   | 71          |                             |                                               |                         |                   | 1.73E+04              |          |
|                        |           | 68 h      | 5      | 1.34     | TIC                                     | 88          |                             |                                               |                         |                   | 1.38E+04              |          |
| 4-methyldecane         | 2847-72-5 | 5 min     | 4      | 1.39     | 9: 43 42 71 41<br>57 39 56 85 51        | 67          |                             |                                               |                         |                   | 4.31E+05              |          |
|                        |           | 1 h       | 5      | 1.40     | 10: 39 57 55 41<br>86 53 69 38 52<br>67 | 66          |                             |                                               |                         |                   | 1.35E+06              |          |
| 2-methylpentane        | 107-83-5  | 5 min     | 5      | 1.40     | 2: 57 86                                | 97          |                             |                                               |                         |                   | 4.02E+05              |          |
|                        |           | 1 h       | 4      | 1.40     | 8: 43 71 42 41<br>57 50 56 86           | 98          |                             |                                               |                         |                   | 1.54E+06              |          |
|                        |           | 68 h      | 6      | 1.40     | 7: 43 42 41 71<br>67 70 72              | 96          |                             |                                               |                         |                   | 2.15E+05              |          |
| 2,3,4-trimethylpentane | 565-75-3  | 68 h      | 7      | 1.41     | 3: 43 39 71                             | 80          |                             |                                               |                         |                   | 1.77E+05              |          |
| Isocyanatomethane      | 624-83-9  | 5 min     | 6      | 1.44     | 2: 39 70                                | 68          |                             |                                               |                         |                   | 3.68E+04              |          |

| Compound                                                                   | CAS       | Ext. Time | Peak # | RT (min) | Models                     | Net % Match | Published Descriptors |                                              | Published ODT (ppm)     |                   | Surrogate   |          |
|----------------------------------------------------------------------------|-----------|-----------|--------|----------|----------------------------|-------------|-----------------------|----------------------------------------------|-------------------------|-------------------|-------------|----------|
|                                                                            |           |           |        |          |                            |             | Flavornet[1]          | TGSC[2]                                      | LRI & Odour Database[3] | Devos, et al. [4] | Conc. (PAC) | OAV      |
| Ethylenimine                                                               | 151-56-4  | 68 h      | 9      | 1.45     | 3: 57 56 67                | 78          |                       |                                              |                         |                   |             | 3.85E+04 |
|                                                                            |           | 5 min     | 7      | 1.45     | 3: 42 43 55                | 76          |                       |                                              |                         |                   |             | 1.94E+04 |
|                                                                            |           | 1 h       | 7      | 1.53     | 1: 41                      | 70          |                       |                                              |                         |                   |             | 5.22E+04 |
| 2-methylaziridine                                                          | 75-55-8   | 5 min     | 8      | 1.45     | TIC                        | 83          |                       |                                              |                         |                   |             | 3.61E+04 |
|                                                                            |           | 68 h      | 8      | 1.45     | 1: 56                      | 78          |                       |                                              |                         |                   |             | 4.85E+04 |
| 3-methylpentane                                                            | 96-14-0   | 5 min     | 9      | 1.45     | 3: 56 57 53                | 91          |                       |                                              |                         |                   |             | 1.05E+05 |
|                                                                            |           | 1 h       | 6      | 1.45     | 5: 57 56 55 58 86          | 98          |                       |                                              |                         |                   |             | 4.24E+05 |
| Propanal                                                                   | 123-38-6  | 68 h      | 10     | 1.46     | TIC                        | 90          |                       |                                              |                         |                   |             | 2.24E+04 |
|                                                                            |           | 68 h      | 11     | 1.57     | TIC                        | 75          | Solvent, Pungent      | Earthy, Alcohol, Wine, Whiskey, Cocoa, Nutty |                         | 2.69E-02          | 2.79E+04    | 1.04E+06 |
| Butane                                                                     | 106-97-8  | 68 h      | 13     | 1.65     | 8: 43 58 42 39 53 57 41 44 | 83          |                       |                                              |                         | 2.04E+02          | 4.69E+06    | 2.30E+04 |
| 1-Propanamine, 3-dibenzo[b,e]thiepin-11(6H)-ylidene-N,N-dimethyl-, S-oxide | 1447-71-8 | 68 h      | 14     | 1.66     | 4: 37 59 60 55             | 73          |                       |                                              |                         |                   |             | 3.29E+05 |
| Acetone                                                                    | 67-64-1   | 5 min     | 10     | 1.66     | 2: 58 43                   | 89          |                       | Solvent                                      |                         | 1.45E+01          | 7.49E+04    | 5.18E+03 |
|                                                                            |           | 1 h       | 8      | 1.65     | 5: 43 42 39 41 37          | 96          |                       | Solvent                                      |                         | 1.45E+01          | 4.78E+05    | 3.30E+04 |
| Methacrolein                                                               | 78-85-3   | 68 h      | 12     | 1.65     | TIC                        | 99          |                       | Solvent                                      |                         | 1.45E+01          | 5.35E+06    | 3.70E+05 |
|                                                                            |           | 68 h      | 15     | 2.13     | TIC                        | 95          |                       | Wild hyacinth foliage                        |                         |                   | 1.40E+05    |          |
| Formic acid                                                                | 64-18-6   | 68 h      | 16     | 2.33     | 3: 45 72 42                | 69          |                       | Acetic                                       |                         | 2.82E+01          | 6.40E+05    | 2.27E+04 |
| Ethanol                                                                    | 64-17-5   | 5 min     | 11     | 2.34     | 2: 45 43                   | 91          | Sweet                 | Alcoholic                                    |                         | 2.88E+01          | 7.27E+04    | 2.52E+03 |
|                                                                            |           | 68 h      | 17     | 2.34     | 6: 45 43 46 72 42 41       | 93          | Sweet                 | Alcoholic                                    |                         | 2.88E+01          | 8.83E+05    | 3.06E+04 |
| Methylene chloride                                                         | 75-09-2   | 5 min     | 12     | 2.42     | 4: 84 51 49 86             | 93          |                       |                                              |                         | 2.82E+01          | 4.51E+04    | 1.60E+03 |
|                                                                            |           | 1 h       | 9      | 2.43     | 2: 47 49                   | 98          |                       |                                              |                         | 2.82E+01          | 2.81E+05    | 9.98E+03 |
|                                                                            |           | 68 h      | 18     | 2.43     | 3: 84 49 51                | 94          |                       |                                              |                         | 2.82E+01          | 7.21E+04    | 2.56E+03 |
| Pentanal                                                                   | 110-62-3  | 68 h      | 19     | 3.66     | TIC                        | 84          | Almond, Malt, Pungent | Fermented                                    |                         | 6.03E-03          | 6.40E+04    | 1.06E+07 |

| Compound                       | CAS         | Ext. Time    | Peak #     | RT (min) | Models                                  | Net % Match | Published Descriptors            |            | Published ODT (ppm)     |                   | Surrogate Conc. |          |
|--------------------------------|-------------|--------------|------------|----------|-----------------------------------------|-------------|----------------------------------|------------|-------------------------|-------------------|-----------------|----------|
|                                |             |              |            |          |                                         |             | Flavornet[1]                     | TGSC[2]    | LRI & Odour Database[3] | Devos, et al. [4] | (PAC)           | OAV      |
| tert-butanol                   | 75-65-0     | 5 min        | 13         | 3.91     | 1: 59                                   | 67          |                                  | Camphor    |                         |                   |                 | 2.32E+04 |
|                                |             | 68 h         | 23         | 3.94     | 2: 33 41                                | 74          |                                  | Camphor    |                         |                   |                 | 5.49E+04 |
| Ethylenediamine                | 107-15-3    | 5 min        | 14         | 3.92     | TIC                                     | 73          |                                  |            |                         |                   |                 | 1.04E+05 |
|                                |             | 68 h         | 21         | 3.93     | TIC                                     | 73          |                                  |            |                         |                   |                 | 1.13E+05 |
| 1,1-dimethyl-hydrazine         | 57-14-7     | 5 min        | 15         | 3.93     | TIC                                     | 79          |                                  |            |                         |                   |                 | 5.44E+04 |
|                                |             | 68 h         | 20         | 3.92     | TIC                                     | 79          |                                  |            |                         |                   |                 | 3.19E+05 |
| Hydrazine                      | 302-01-2    | 5 min        | 16         | 3.95     | 1: 33                                   | 76          |                                  | Ammoniacal |                         | 3.00E+00          | 1.58E+03        | 5.26E+02 |
|                                |             | 68 h         | 22         | 3.93     | 1: 33                                   | 77          |                                  |            |                         | 3.00E+00          | 5.33E+03        | 1.78E+03 |
| Hexanal                        | 66-25-1     | 68 h         | 24         | 5.99     | 4: 44 42 67 40                          | 96          | Grass, Tallow, Fat               | Green      |                         | 1.38E-02          | 5.52E+05        | 4.00E+07 |
|                                |             | 68 h         | 25         | 6.12     | TIC                                     | 93          | Medicine, Fruit                  | Fermented  |                         | 4.90E-01          | 5.54E+04        | 1.13E+05 |
| Nonane                         | 111-84-2    | 68 h         | 26         | 6.70     | 11: 41 71 85 70                         | 95          | Alkane                           | Gasoline   |                         | 1.26E+00          | 5.78E+05        | 4.59E+05 |
|                                |             |              |            |          |                                         |             |                                  |            |                         |                   |                 |          |
| Sabinene                       | 3387-41-5   | 5 min        | 17         | 7.90     | 4: 93 79 107 106 82                     |             | Pepper, Turpentine, Wood         | Woody      |                         |                   |                 | 6.25E+04 |
|                                |             |              |            |          |                                         |             |                                  |            |                         |                   |                 |          |
| $\alpha$ -phellandrene         | 99-83-2     | 5 min        | 19         | 7.90     | TIC                                     | 87          | Turpentine, Mint, Terpenic Spice |            |                         |                   |                 | 5.43E+04 |
|                                |             | 1 h          | 12         | 7.92     | 13: 94 91 93 55 90                      | 90          | Turpentine, Mint, Terpenic Spice |            |                         |                   |                 | 8.87E+04 |
|                                |             | 68 h         | 27         | 7.93     | 11: 93 91 55 92 94 79 41 136 77 107 105 | 86          | Turpentine, Mint, Terpenic Spice |            |                         |                   |                 | 2.28E+05 |
| $\alpha$ -pinene               | 80-56-8     | 5 min        | 18         | 7.90     | TIC                                     | 85          | Pine, Turpentine                 | Herbal     |                         | 6.92E-01          | 5.43E+04        | 7.85E+04 |
|                                |             | 1 h          | 13         | 7.93     | 8: 93 81 68 107 43 105 95 78            | 93          | Pine, Turpentine                 | Herbal     |                         | 6.92E-01          | 3.65E+05        | 5.28E+05 |
| $\gamma$ -terpinene            | 99-85-4     | 68 h         | 28         | 7.93     | TIC                                     | 92          | Pine, Turpentine                 | Herbal     |                         | 6.92E-01          | 1.24E+05        | 1.80E+05 |
|                                |             | 5 min        | 20         | 7.90     | 4: 93 53 136 41                         | 74          | Gasoline, Turpentine             | Terpenic   |                         |                   |                 | 9.27E+04 |
| 2-isopropenyl-3-methylpyrazine | 145984-65-2 | 5 min        | 21         | 7.90     | 1: 134                                  | 67          |                                  |            |                         |                   |                 | 7.52E+03 |
|                                |             | (+)-4-Carene | 29050-33-7 | 1 h      | 10                                      | 7.91        | 5: 105 119 121 80 136            | 67         |                         | 4.00E+00          |                 | 7.28E+04 |

| Compound                      | CAS        | Ext. Time | Peak # | RT (min) | Models                                                                   | Net % Match | Published Descriptors   |                                               | Published ODT (ppm)     |                   | Surrogate   |          |
|-------------------------------|------------|-----------|--------|----------|--------------------------------------------------------------------------|-------------|-------------------------|-----------------------------------------------|-------------------------|-------------------|-------------|----------|
|                               |            |           |        |          |                                                                          |             | Flavornet[1]            | TGSC[2]                                       | LRI & Odour Database[3] | Devos, et al. [4] | Conc. (PAC) | OAV      |
| Betahistine                   | 5638-76-6  | 1 h       | 11     | 7.91     | 8: 136 93 80 43<br>41 106 65 94                                          | 70          |                         |                                               |                         |                   |             | 5.56E+05 |
| 2-heptanone                   | 110-43-0   | 68 h      | 29     | 8.45     | TIC                                                                      | 93          | Soap                    | Cheesy                                        |                         | 1.41E-01          | 2.14E+05    | 1.51E+06 |
| Isoamyl alcohol               | 123-51-3   | 68 h      | 30     | 8.61     | 4: 67 53 39 85                                                           | 67          | Whiskey, Malt, Burnt    | Fusel oil, Alcoholic, Whiskey, Fruity, Banana |                         | 4.47E-02          | 1.41E+05    | 3.17E+06 |
| Heptanal                      | 111-71-7   | 68 h      | 31     | 8.62     | 13: 42 69 71 55<br>39 81 86 45 96<br>85 53 54 65                         | 97          | Fat, Citrus, Rancid     | Green                                         |                         | 4.79E-03          | 1.22E+06    | 2.54E+08 |
| 4-methylpyrimidine            | 3438-46-8  | 68 h      | 32     | 9.06     | 4: 94 67 51 42                                                           | 91          |                         |                                               |                         |                   |             | 1.75E+05 |
| 4-pyridinamine                | 504-24-5   | 68 h      | 33     | 9.06     | TIC                                                                      | 88          |                         |                                               |                         |                   |             | 7.41E+04 |
| 1,3,5-triazine-2,4,6-triamine | 108-78-1   | 5 min     | 22     | 9.27     | 1: 126                                                                   | 67          |                         |                                               |                         |                   |             | 2.43E+03 |
| Styrene                       | 100-42-5   | 68 h      | 34     | 9.45     | 4: 103 78 51 83                                                          | 92          | Balsamic, Gasoline      | Balsamic                                      |                         | 1.45E-01          | 5.62E+04    | 3.89E+05 |
| Myrcene                       | 123-35-3   | 1 h       | 14     | 9.93     | TIC                                                                      | 92          | Balsamic, Must, Spice   | Peppery, Terpene, Spicy, Balsam, Plastic      | 1.30E-02                |                   | 2.88E+05    | 2.22E+07 |
|                               |            | 68 h      | 35     | 9.94     | 17: 94 137 66 82 94<br>89 42 115 70 119<br>54 61 107 122 76<br>57 56 62  |             | Balsamic, Must, Spice   | Peppery, Terpene, Spicy, Balsam, Plastic      | 1.30E-02                |                   | 6.31E+06    | 4.85E+08 |
| $\beta$ -pinene               | 18172-67-3 | 68 h      | 36     | 9.97     | 17: 70 121 43 54 97<br>38 56 122 62 106<br>89 83 134 61 137<br>76 75 120 |             | Pine, Resin, Turpentine | Terpenic                                      |                         |                   | 1.67E+07    |          |

| Compound                | CAS        | Ext. Time | Peak # | RT (min) | Models                                           | Net % Match | Published Descriptors                    |                                                        | Published ODT (ppm)     |                   | Surrogate   |     |
|-------------------------|------------|-----------|--------|----------|--------------------------------------------------|-------------|------------------------------------------|--------------------------------------------------------|-------------------------|-------------------|-------------|-----|
|                         |            |           |        |          |                                                  |             | Flavornet[1]                             | TGSC[2]                                                | LRI & Odour Database[3] | Devos, et al. [4] | Conc. (PAC) | OAV |
| Dimethylpyrazine        | 123-32-0   | 68 h      | 37     | 10.63    | TIC                                              | 71          | Cocoa, Roasted nut, Roast beef, Medicine | Cocoa, Roasted nuts, Roast Beef, Woody, Grass, Medical |                         |                   | 7.94E+03    |     |
| 1-hexanol               | 111-27-3   | 68 h      | 38     | 10.74    | 4: 56 69 42 84                                   | 85          | Resin, Flower, Breen                     | Herbal                                                 | 4.37E-02                | 1.38E+05          | 3.15E+06    |     |
| Camphene                | 79-92-5    | 1 h       | 16     | 10.89    | 12: 91 53 67 65<br>121 107 80 105<br>93 77 41 95 | 87          | Camphor                                  | Woody                                                  |                         | 4.38E+05          |             |     |
| Limonene                | 138-86-3   | 68 h      | 40     | 10.91    | TIC                                              | 89          | Camphor                                  | Woody                                                  |                         | 1.38E+06          |             |     |
|                         |            | 5 min     | 23     | 10.89    | 3: 93 67 68                                      | 68          | Lemon, Orange                            | Citrus                                                 | 4.37E-01                | 1.42E+04          | 3.26E+04    |     |
|                         |            | 1 h       | 15     | 10.89    | 12: 91 53 67 65<br>121 107 80 105<br>93 77 41 95 | 92          | Lemon, Orange                            | Citrus                                                 | 4.37E-01                | 4.38E+05          | 1.00E+06    |     |
| Piperidine              | 110-89-4   | 68 h      | 39     | 10.91    | TIC                                              | 95          | Lemon, Orange                            | Citrus                                                 | 4.37E-01                | 1.38E+06          | 3.17E+06    |     |
|                         |            | 68 h      | 41     | 11.20    | 2: 44 57                                         | 67          |                                          | Animal                                                 | 3.72E-01                | 1.71E+05          | 4.61E+05    |     |
| Octanal                 | 124-13-0   | 68 h      | 42     | 11.21    | TIC                                              | 89          | Fat, Soap, Lemon, Green                  | Aldehydic, Waxy, Citrus, Orange peel, Green, Fatty     | 1.35E-03                | 1.43E+05          | 1.06E+08    |     |
| m-cymene                | 535-77-3   | 68 h      | 43     | 11.38    | TIC                                              | 91          |                                          |                                                        |                         | 3.47E+04          |             |     |
| Methylisohexenyl ketone | 110-93-0   | 68 h      | 44     | 11.54    | TIC                                              | 95          | Pepper, Mushroom, Rubber                 | Citrus                                                 | 3.80E-02                | 1.15E+06          | 3.04E+07    |     |
| δ-3-carene              | 13466-78-9 | 68 h      | 45     | 11.63    | TIC                                              | 97          | Lemon, Resin                             | Citrus                                                 | 4.00E+00                | 1.30E+06          | 3.25E+05    |     |
| 1-butoxy-2-propanol     | 5131-66-8  | 68 h      | 46     | 11.77    | 2: 57 75                                         | 67          |                                          |                                                        |                         | 5.72E+04          |             |     |
| 2-butoxyethanol         | 111-76-2   | 68 h      | 47     | 11.77    | TIC                                              | 83          |                                          |                                                        | 3.39E-01                | 5.08E+04          | 1.50E+05    |     |
| Undecane                | 1120-21-4  | 68 h      | 48     | 11.89    | 8: 42 84 85 156<br>113 55 112 39                 | 95          | Alkane                                   |                                                        | 1.17E+00                | 5.89E+05          | 5.01E+05    |     |
| Acetic acid             | 64-19-7    | 68 h      | 49     | 12.23    | 6: 45 43 60 42<br>41 61                          | 99          | Sour                                     | Acidic                                                 | 1.45E-01                | 4.07E+06          | 2.82E+07    |     |

| Compound                      | CAS       | Ext. Time | Peak # | RT (min) | Models                                                                             | Net % Match | Published Descriptors   |                                                      | Published ODT (ppm)     |                   | Surrogate   |     |
|-------------------------------|-----------|-----------|--------|----------|------------------------------------------------------------------------------------|-------------|-------------------------|------------------------------------------------------|-------------------------|-------------------|-------------|-----|
|                               |           |           |        |          |                                                                                    |             | Flavornet[1]            | TGSC[2]                                              | LRI & Odour Database[3] | Devos, et al. [4] | Conc. (PAC) | OAV |
| Furfural                      | 98-01-1   | 68 h      | 50     | 12.70    | 6: 95 96 67 97<br>38 37                                                            | 97          | Bread, Almond,<br>Sweet | Sweet,<br>Woody,<br>Almond,<br>Baked bread<br>Floral | 7.76E-01                | 1.44E+05          | 1.86E+05    |     |
| Citronellolformate            | 105-85-1  | 68 h      | 51     | 13.09    | 11: 69 41 105 65 70<br>77 54 51 138 96<br>42 81                                    |             |                         |                                                      |                         | 2.96E+05          |             |     |
| 1,3-dichlorobenzene           | 541-73-1  | 68 h      | 52     | 13.16    | 8: 111 50 113 74 99<br>149 55 112 75                                               |             |                         |                                                      |                         | 4.74E+05          |             |     |
| 2-ethylhexanol                | 104-76-7  | 1 h       | 17     | 13.81    | TIC                                                                                | 87          | Rose, Green             | Citrus                                               | 2.45E-01                | 1.48E+05          | 6.05E+05    |     |
|                               |           | 68 h      | 53     | 13.83    | 15: 57 41 121 43 86<br>71 136 70 83 84<br>55 98 39 69 81<br>53                     |             | Rose, Green             | Citrus                                               | 2.45E-01                | 8.30E+05          | 3.38E+06    |     |
| 5-methylindane                | 874-35-1  | 68 h      | 54     | 13.90    | 9: 132 92 115<br>131 73 91 133 65<br>128                                           | 82          |                         |                                                      |                         | 4.21E+05          |             |     |
| 2-ethenyl-1,3-dimethylbenzene | 2039-90-9 | 68 h      | 55     | 13.91    | 7: 115 45 102<br>129 114 82 39                                                     | 87          |                         |                                                      |                         | 2.52E+05          |             |     |
| Benzaldehyde                  | 100-52-7  | 1 h       | 18     | 14.08    | TIC                                                                                | 98          | Almond, Burnt<br>sugar  | Fruity                                               | 4.17E-02                | 8.98E+05          | 2.15E+07    |     |
|                               |           | 68 h      | 56     | 14.06    | 11: 106 105 77<br>51 52 76 53 39<br>38 62 36                                       | 99          | Almond, Burnt<br>sugar  | Fruity                                               | 4.17E-02                | 1.90E+07          | 4.55E+08    |     |
| 2-chloroacetophenone          | 532-27-4  | 5 min     | 24     | 14.12    | 2: 77 105                                                                          | 75          |                         |                                                      | 2.57E-02                | 4.00E+03          | 1.56E+05    |     |
|                               |           | 1 h       | 19     | 14.08    | 6: 105 51 77 52<br>78 63                                                           | 78          |                         |                                                      | 2.57E-02                | 6.57E+05          | 2.56E+07    |     |
|                               |           | 68 h      | 57     | 14.07    | 6: 57 60 49 43<br>61 86                                                            | 77          |                         |                                                      | 2.57E-02                | 4.11E+05          | 1.60E+07    |     |
| Dodecane                      | 112-40-3  | 68 h      | 58     | 14.21    | 20: 57 55 41 59<br>122 83 112 72<br>113 93 70 170 98<br>67 127 95 97 193<br>171 58 | 70          | Alkane                  | Alkane                                               | 2.04E+00                | 2.11E+06          | 1.03E+06    |     |
| tert-butyl-benzene            | 98-06-6   | 68 h      | 59     | 14.49    | 7: 92 117 119<br>120 115 131 66                                                    | 89          |                         |                                                      |                         | 1.24E+05          |             |     |

| Compound            | CAS        | Ext. Time | Peak # | RT (min) | Models                                                                        | Net % Match | Published Descriptors          |                                                            | Published ODT (ppm)     |                   | Surrogate   |     |
|---------------------|------------|-----------|--------|----------|-------------------------------------------------------------------------------|-------------|--------------------------------|------------------------------------------------------------|-------------------------|-------------------|-------------|-----|
|                     |            |           |        |          |                                                                               |             | Flavornet[1]                   | TGSC[2]                                                    | LRI & Odour Database[3] | Devos, et al. [4] | Conc. (PAC) | OAV |
| Linalool            | 78-70-6    | 1 h       | 20     | 15.12    | TIC                                                                           | 91          | Flower, Lavender               | Floral                                                     | 5.37E-02                | 3.31E+05          | 6.16E+06    |     |
|                     |            | 68 h      | 60     | 15.14    | 19: 71 93 43 41<br>69 80 121 67 82<br>65 83 72 81 111<br>107 105 136 39<br>79 | 98          | Flower, Lavender               | Floral                                                     | 5.37E-02                | 1.92E+06          | 3.57E+07    |     |
| cis-2-pinanol       | 4948-29-2  | 1 h       | 21     | 15.43    | TIC                                                                           | 72          |                                | Herbal                                                     |                         | 1.30E+04          |             |     |
| Benzonitrile        | 100-47-0   | 68 h      | 61     | 15.46    | TIC                                                                           | 87          | Rancid, Sweet                  |                                                            |                         | 7.23E+04          |             |     |
| $\alpha$ -ionol     | 25312-34-9 | 68 h      | 62     | 15.67    | TIC                                                                           | 81          |                                | Ionone,<br>Tropical,<br>Sweet, Floral,<br>Violet,<br>Woody |                         | 8.15E+05          |             |     |
| Fenchyl alcohol     | 1632-73-1  | 1 h       | 22     | 15.72    | TIC                                                                           | 78          | Camphor                        | Camphor,<br>Borneol, Pine,<br>Woody, Dry,<br>Sweet, Lemon  |                         | 5.65E+04          |             |     |
| 2-ethoxyethanol     | 110-80-5   | 68 h      | 63     | 15.78    | 2: 45 60                                                                      | 69          |                                |                                                            | 1.23E+00                | 3.10E+04          | 2.52E+04    |     |
| Decanal             | 112-31-2   | 68 h      | 64     | 15.90    | 12: 43 82 57 71<br>83 56 70 95 39<br>72 128 97                                | 93          | Soap, Orange<br>peel, Tallow   | Aldehydic                                                  | 8.91E-04                | 5.62E+05          | 6.30E+08    |     |
|                     |            |           |        |          |                                                                               |             |                                |                                                            |                         |                   |             |     |
| Methyl heptadienone | 1604-28-0  | 68 h      | 65     | 15.91    | 17: 55 41 71 81<br>43 54 77 42 110<br>44 56 85 96 79<br>53 65 128             | 72          |                                | Cinnamon,<br>Coconut,<br>Spice,<br>Woody,<br>Sweet, Weedy  |                         | 4.69E+05          |             |     |
| Methyl benzoate     | 93-58-3    | 68 h      | 66     | 16.25    | 4: 115 51 77 130 75                                                           | 75          | Prune, Lettuce,<br>Herb, Sweet | Phenolic                                                   | 1.07E-01                | 2.73E+04          | 2.55E+05    |     |
| Tridecane           | 629-50-5   | 68 h      | 67     | 16.38    | 15: 57 43 55 85<br>141 84 56 99 58<br>86 69 83 127 39<br>53                   | 92          | Alkane                         | Alkane                                                     | 2.14E+00                | 5.78E+05          | 2.70E+05    |     |
|                     |            |           |        |          |                                                                               |             |                                |                                                            |                         |                   |             |     |
| Acetophenone        | 98-86-2    | 68 h      | 68     | 16.50    | 5: 77 226 51 163 92<br>50                                                     | 92          | Musty, Flower,<br>Almond       | Floral                                                     | 3.63E-01                | 2.09E+05          | 5.74E+05    |     |
| Salicylaldehyde     | 90-02-8    | 68 h      | 69     | 16.82    | 3: 91 121 93                                                                  | 68          |                                | Medicinal                                                  | 7.41E-03                | 1.33E+04          | 1.80E+06    |     |
| Benzyl formate      | 104-57-4   | 68 h      | 70     | 17.06    | 4: 136 90 91 119 71                                                           |             |                                | Floral                                                     |                         | 3.64E+04          |             |     |

| Compound                | CAS       | Ext. Time | Peak # | RT (min) | Models                                                                     | Net % Match | Published Descriptors   |                                       | Published ODT (ppm)     |                   | Surrogate   |          |
|-------------------------|-----------|-----------|--------|----------|----------------------------------------------------------------------------|-------------|-------------------------|---------------------------------------|-------------------------|-------------------|-------------|----------|
|                         |           |           |        |          |                                                                            |             | Flavornet[1]            | TGSC[2]                               | LRI & Odour Database[3] | Devos, et al. [4] | Conc. (PAC) | OAV      |
| 2-methyl-1H-imidazole   | 693-98-1  | 68 h      | 71     | 17.13    | 4: 82 148 43 81                                                            | 68          |                         |                                       |                         |                   |             | 2.64E+04 |
| $\alpha$ -terpineol     | 98-55-5   | 1 h       | 23     | 17.74    | TIC                                                                        | 80          | Oil, Anise, Mint        | Floral                                |                         | 3.72E-02          | 3.75E+04    | 1.01E+06 |
|                         |           | 68 h      | 72     | 17.74    | 17: 136 59 112<br>139 81 92 67 95<br>122 79 68 80 78<br>121 54 105 51      | 91          | Oil, Anise, Mint        | Floral                                |                         | 3.72E-02          | 4.43E+05    | 1.19E+07 |
| Acetamide               | 60-35-5   | 68 h      | 73     | 17.88    | 1: 43                                                                      | 70          |                         | Mousy                                 |                         | 6.03E+01          | 5.33E+04    | 8.85E+02 |
| Benzyl acetate          | 140-11-4  | 68 h      | 74     | 18.05    | 5: 107 91 90 108 150                                                       | 80          | Fresh, Boiled vegetable | Sweet, Floral, Fruity, Jasmine, Fresh |                         | 1.45E-01          | 8.01E+04    | 5.54E+05 |
| Verbenone               | 80-57-9   | 1 h       | 24     | 18.16    | TIC                                                                        | 75          |                         | Camphor, Menthol, Celery              |                         |                   |             | 9.46E+03 |
| DL-carvone              | 99-49-0   | 68 h      | 75     | 18.71    | 4: 108 54 93 79                                                            | 70          | Mint, Basil, Fennel     | Minty, Licorice                       |                         | 2.24E-02          | 6.11E+04    | 2.73E+06 |
| Methyl acetylsalicylate | 580-02-9  | 68 h      | 76     | 18.88    | 6: 121 152 153 64 65 43                                                    | 93          |                         |                                       |                         |                   |             | 2.13E+05 |
| Methyl salicylate       | 119-36-8  | 68 h      | 77     | 18.88    | TIC                                                                        | 93          | Peppermint              | Minty                                 |                         | 4.37E-02          | 1.31E+05    | 3.00E+06 |
| (+)-sativene            | 3650-28-0 | 1 h       | 25     | 19.70    | 20: 93 69 120 148 106 68 55 92 189 95 149 175 135 162 190 136 83 91 53 103 | 75          |                         |                                       |                         |                   |             | 2.37E+07 |
| Tyramine                | 51-67-2   | 1 h       | 27     | 19.73    | 6: 51 85 38 62 90 75                                                       | 70          |                         | Meaty                                 |                         |                   |             | 9.20E+06 |
| $\beta$ -caryophyllene  | 87-44-5   | 68 h      | 78     | 19.74    | 3: 122 56 110                                                              | 83          | Wood, Spice             | Spice                                 | 6.40E-02                |                   | 4.77E+06    | 7.46E+07 |
| Benzyl Alcohol          | 100-51-6  | 5 min     | 25     | 19.75    | 7: 107 79 51 108 89 89 105 78                                              | 89          | Sweet, Flower           | Floral                                |                         |                   |             | 2.31E+05 |
|                         |           | 1 h       | 26     | 19.71    | 11: 78 53 109 149 39 129 66 65 123 134 202                                 | 96          | Sweet, Flower           | Floral                                |                         |                   |             | 2.16E+07 |
|                         |           | 68 h      | 79     | 19.77    | TIC                                                                        | 100         | Sweet, Flower           | Floral                                |                         |                   |             | 1.47E+08 |



| Compound              | CAS        | Ext. Time | Peak # | RT (min) | Models                                                                                   | Net % Match | Published Descriptors        |         | Published ODT (ppm)     |                   | Surrogate   |          |
|-----------------------|------------|-----------|--------|----------|------------------------------------------------------------------------------------------|-------------|------------------------------|---------|-------------------------|-------------------|-------------|----------|
|                       |            |           |        |          |                                                                                          |             | Flavornet[1]                 | TGSC[2] | LRI & Odour Database[3] | Devos, et al. [4] | Conc. (PAC) | OAV      |
| $\alpha$ -terpinene   | 99-86-5    | 68 h      | 80     | 20.00    | 15: 105 80 94<br>136 106 68 91<br>161 40 65 189 43<br>55 135 83                          | 70          | Lemon                        | Woody   |                         |                   | 3.84E+05    |          |
| $\alpha$ -longipinene | 5989-08-2  | 68 h      | 81     | 20.02    | 19: 121 136 119 76<br>161 122 91 55 81<br>41 67 135 39 189<br>78 80 53 137 56<br>82      |             |                              |         |                         |                   | 6.13E+05    |          |
| Phenylethyl alcohol   | 60-12-8    | 68 h      | 82     | 20.38    | 3: 92 122 91                                                                             | 76          | Honey, Spice,<br>Rose, Lilac | Floral  |                         | 1.70E-02          | 4.48E+04    | 2.64E+06 |
| 2-methyl naphthalene  | 91-57-6    | 68 h      | 83     | 20.44    | 7: 142 116 141 93<br>139 221 115 211                                                     |             |                              | Floral  |                         |                   | 2.47E+05    |          |
| $\alpha$ -humulene    | 6753-98-6  | 1 h       | 28     | 20.55    | 20: 93 80 121 98<br>107 79 92 147 91<br>70 41 105 109<br>205 94 122 189<br>106 82 204 95 | 98          | Wood                         | Wood    | 1.20E-01                |                   | 3.99E+06    | 3.32E+07 |
|                       |            | 68 h      | 84     | 20.57    | 20: 93 121 80 67 97<br>92 189 147 94<br>204 91 53 41 107<br>95 106 79 55 161<br>109 77   |             | Wood                         | Wood    | 1.20E-01                |                   | 3.65E+06    | 3.04E+07 |
| Benzyl nitrile        | 140-29-4   | 68 h      | 85     | 20.71    | 2: 90 116                                                                                | 71          |                              |         |                         |                   | 8.20E+04    |          |
| $\alpha$ -cubebene    | 17699-14-8 | 68 h      | 86     | 20.92    | 4: 161 105 119 193                                                                       | 66          | Herb, Wax                    | Herb    |                         |                   | 3.82E+04    |          |
| $\beta$ -selinene     | 17066-67-0 | 1 h       | 29     | 21.28    | 17: 147 205 68 133 161 148 189<br>105 175 93 107<br>135 109 123 53<br>69 134             | 95          | Herb                         | Herb    |                         |                   | 6.66E+05    |          |

| Compound            | CAS       | Ext. Time | Peak # | RT (min) | Models                                                                                     | Net % Match | Published Descriptors |          | Published ODT (ppm)     |                   | Surrogate Conc. |          |
|---------------------|-----------|-----------|--------|----------|--------------------------------------------------------------------------------------------|-------------|-----------------------|----------|-------------------------|-------------------|-----------------|----------|
|                     |           |           |        |          |                                                                                            |             | Flavornet[1]          | TGSC[2]  | LRI & Odour Database[3] | Devos, et al. [4] | (PAC)           | OAV      |
|                     |           | 68 h      | 87     | 21.29    | 20: 95 160 81<br>135 108 80 149<br>67 119 106 41<br>109 205 175 94<br>53 141 136 52<br>190 | 98          | Herb                  | Herb     |                         |                   | 2.92E+06        |          |
| Aromadendrene       | 489-39-4  | 1 h       | 32     | 21.70    | TIC                                                                                        | 71          | Wood                  | Wood     |                         |                   | 8.73E+04        |          |
|                     |           | 68 h      | 88     | 21.30    | 20: 91 79 108<br>107 105 121 93<br>204 161 95 81<br>119 145 92 147<br>67 83 106 122 77     | 79          | Wood                  | Wood     |                         |                   | 3.56E+06        |          |
| $\alpha$ -guaiene   | 3691-12-1 | 1 h       | 30     | 21.38    | TIC                                                                                        | 72          | Wood, Balsamic        | Wood     |                         |                   | 3.36E+05        |          |
|                     |           | 68 h      | 92     | 21.72    | 20: 121 204 148<br>107 83 122 120<br>129 189 84 115<br>79 41 77 106 95<br>133 53 147 55    | 79          | Wood, Balsamic        | Wood     |                         |                   | 1.32E+06        |          |
| $\alpha$ -gurjunene | 489-40-7  | 1 h       | 31     | 21.40    | TIC                                                                                        | 88          | Wood, Balsamic        | Wood     |                         |                   | 2.34E+05        |          |
|                     |           | 68 h      | 89     | 21.44    | 20: 69 41 91 109 86<br>134 108 43 92<br>149 65 147 189<br>135 206 52 119<br>96 120 42 136  | 86          | Wood, Balsamic        | Wood     |                         |                   | 7.00E+06        |          |
| $\beta$ -cedrene    | 546-28-1  | 68 h      | 90     | 21.45    | 11: 69 148 41 94 76<br>67 96 92 80 136<br>53 68                                            |             |                       |          |                         |                   | 1.93E+06        |          |
| Phenol              | 108-95-2  | 68 h      | 91     | 21.64    | TIC                                                                                        | 90          | Phenolic              | Phenolic | 1.10E-01                |                   | 2.37E+05        | 2.16E+06 |
| Dyclocaïne          | 586-60-7  | 1 h       | 33     | 21.70    | 8: 120 105 67<br>109 122 121 91<br>119                                                     | 66          |                       |          |                         |                   | 1.69E+05        |          |
|                     |           | 68 h      | 93     | 21.74    | 6: 83 145 123<br>104 95 159                                                                | 67          |                       |          |                         |                   | 2.71E+05        |          |

| Compound            | CAS        | Ext. Time | Peak # | RT (min) | Models                                                                                           | Net % Match | Published Descriptors |                                  | Published ODT (ppm)     |                   | Surrogate Conc. (PAC) | OAV |
|---------------------|------------|-----------|--------|----------|--------------------------------------------------------------------------------------------------|-------------|-----------------------|----------------------------------|-------------------------|-------------------|-----------------------|-----|
|                     |            |           |        |          |                                                                                                  |             | Flavornet[1]          | TGSC[2]                          | LRI & Odour Database[3] | Devos, et al. [4] |                       |     |
| (+)-calarene        | 17334-55-3 | 1 h       | 34     | 21.79    | 17: 147 109 161 78<br>91 148 204 135<br>133 92 189 107<br>94 93 159 134 41<br>149                |             |                       |                                  |                         |                   | 6.42E+05              |     |
|                     |            | 68 h      | 94     | 21.81    | 20: 161 204 147 84<br>162 108 133 106<br>105 91 107 65<br>176 67 95 160<br>135 150 189 109<br>41 |             |                       |                                  |                         |                   | 2.84E+06              |     |
| $\alpha$ -cedrene   | 469-61-4   | 1 h       | 35     | 22.09    | 15: 119 204 161 72<br>93 65 69 133 80<br>121 135 134 41<br>189 94 79                             |             |                       | Woody,<br>Cedar, Sweet,<br>Fresh |                         |                   | 4.47E+05              |     |
| Valencene           | 4630-07-3  | 1 h       | 36     | 22.20    | 20: 161 204 131 96<br>133 91 53 106<br>190 68 108 43 66<br>77 94 162 78 148<br>73 160 143        | Green, Oil  |                       | Citrus                           |                         |                   | 3.46E+06              |     |
|                     |            | 68 h      | 95     | 22.25    | 20: 161 133 135 96<br>91 93 119 51 107<br>67 81 77 104 41<br>55 63 175 108<br>136 94 132         | Green, Oil  |                       | Citrus                           |                         | 8.12E+06          |                       |     |
| $\gamma$ -gurjunene | 22567-17-5 | 1 h       | 37     | 22.30    | 20: 93 147 77 92<br>105 129 108 79<br>189 119 81 91<br>135 106 175 131<br>145 205 51 95<br>109   |             |                       | Musty                            |                         |                   | 4.50E+06              |     |
|                     |            | 68 h      | 96     | 22.34    | 20: 161 122 204 92<br>107 105 91 93 81<br>149 67 77 108<br>147 148 109 134<br>120 106 65 136     |             |                       | Musty                            |                         | 4.02E+07          |                       |     |

| Compound                       | CAS        | Ext. Time | Peak # | RT (min) | Models                                                                      | Net % Match | Published Descriptors |                                                                   | Published ODT (ppm)     |                   | Surrogate   |     |
|--------------------------------|------------|-----------|--------|----------|-----------------------------------------------------------------------------|-------------|-----------------------|-------------------------------------------------------------------|-------------------------|-------------------|-------------|-----|
|                                |            |           |        |          |                                                                             |             | Flavornet[1]          | TGSC[2]                                                           | LRI & Odour Database[3] | Devos, et al. [4] | Conc. (PAC) | OAV |
| Dimethyl-benzylcarbiny acetate | 151-05-3   | 68 h      | 97     | 22.43    | TIC                                                                         | 72          |                       | Sweet, Floral, Fruity, Rose, Green, Pear, Berry, Jasmine, Powdery |                         |                   | 1.42E+06    |     |
| 2,6-dimethylquinoline          | 877-43-0   | 68 h      | 98     | 23.17    | 15: 157 153 200 74<br>218 164 158 156<br>115 63 68 105 91<br>128 201 139    | 74          |                       |                                                                   |                         |                   | 3.28E+05    |     |
| 2-phenoxyethanol               | 122-99-6   | 68 h      | 99     | 23.76    | 18: 94 138 77 79 94<br>39 119 95 91 45<br>51 232 50 78 92<br>182 96 75 125  | 94          |                       | Mild, Rose, Balsam, Cinnamyl                                      |                         |                   | 1.18E+06    |     |
| Nerolidol                      | 7212-44-4  | 68 h      | 100    | 23.98    | 20: 69 41 81 43 79 163 108 121 123 136 97 91 178 120 119 94 140 160 133 155 | 78          | Wood, Flower, Wax     | Floral                                                            |                         |                   | 2.92E+06    |     |
| (+)-nerolidol                  | 142-50-7   | 68 h      | 101    | 23.99    | 20: 69 107 123 80 163 110 133 161 91 150 120 162 68 119 105 95 77 70 92 149 | 80          |                       | Floral                                                            |                         |                   | 3.11E+06    |     |
| Caryophyllene oxide            | 1139-30-6  | 1 h       | 38     | 24.09    | TIC                                                                         | 74          | Herb, Sweet, Spice    | Woody                                                             |                         |                   | 2.69E+04    |     |
|                                |            | 68 h      | 102    | 24.11    | TIC                                                                         | 90          | Herb, Sweet, Spice    | Woody                                                             |                         |                   | 1.99E+06    |     |
| Methyl anthranilate            | 134-20-3   | 68 h      | 103    | 25.23    | 5: 120 119 151 98 65                                                        | 87          | Honey, Flower         | Fruity                                                            | 1.15E-03                | 5.83E+04          | 5.07E+07    |     |
| 2,4-di-tert-butylphenol        | 96-76-4    | 68 h      | 104    | 26.37    | 3: 191 74 206                                                               | 74          |                       | Phenolic                                                          |                         |                   | 1.37E+05    |     |
| $\alpha$ -bisabolol            | 72691-24-8 | 1 h       | 39     | 26.43    | TIC                                                                         | 77          |                       |                                                                   |                         |                   | 3.95E+04    |     |

| Compound          | CAS      | Ext. Time | Peak # | RT (min) | Models                                                                                | Net % Match | Published Descriptors |                                                    | Published ODT (ppm)     |                   | Surrogate Conc. (PAC) | OAV |
|-------------------|----------|-----------|--------|----------|---------------------------------------------------------------------------------------|-------------|-----------------------|----------------------------------------------------|-------------------------|-------------------|-----------------------|-----|
|                   |          |           |        |          |                                                                                       |             | Flavornet[1]          | TGSC[2]                                            | LRI & Odour Database[3] | Devos, et al. [4] |                       |     |
|                   |          | 68 h      | 105    | 26.45    | 20: 109 43 41 95 98<br>121 94 71 147<br>122 55 68 148 81<br>77 91 80 56 97<br>190 134 |             |                       |                                                    |                         |                   | 6.77E+06              |     |
| (-)-Globulol      | 489-41-8 | 68 h      | 106    | 27.33    | 8: 79 222 190 83 73<br>133 92 94 39                                                   |             |                       |                                                    |                         |                   | 6.55E+05              |     |
| Diethyl Phthalate | 84-66-2  | 68 h      | 107    | 27.45    | 12: 149 177 122 97<br>76 176 105 222<br>121 75 194 178<br>151                         |             |                       |                                                    |                         |                   | 1.62E+06              |     |
| Benzophenone      | 119-61-9 | 68 h      | 108    | 28.79    | TIC                                                                                   | 85          |                       | Balsam, Rose,<br>Metallic,<br>Powdery,<br>Geranium |                         |                   | 7.99E+04              |     |

A total of 124 chemical peaks were tentatively identified by *multidimensional* GC-MS. [1] Acree TE, Arn H. Flavornet and human odor space [Internet]. Geneva, NY: Cornell University; [2004; cited 2014 August 08]. Available from: <http://flavornet.org/flavornet.html> [2] The Good Scents Company Information System [Internet]. Oak Creek, WI; [1994; cited 2014 August 08]. Available from: <http://www.thegoodscentcompany.com/index.html#> [3] Mottram R. LRI & Odour Database [Internet]. UK: University of Reading; [2006; cited 2014 August 08]. Available from: [www.odour.org.uk/index.html](http://www.odour.org.uk/index.html) [4] Devos M, Patte F, Rouault J, Laffort P, Van Gemert LJ, editors. Standardized Human Olfactory Thresholds. IRL Press at Oxford Press; 1990. Peak # refers to chronological order compounds eluted from the analytical GC column; RT refers to retention time in min; Quantifying Ions are the component ions (number of ions used to quantify :corresponding m/z in order of relative abundance) or total ion chromatogram (TIC) used in AMDIS target library search and signal integration; % Match is net percent probability match of unknown spectra to database spectra, calculated by AMDIS; Surrogate Conc. is MS response to each separated compound, in peak area counts (PAC) (i.e. the integrated area under the curve of each chromatographic peak); OAV is the calculated Odor Activity Value (ratio of surrogate concentration to odor detection threshold), assuming equal mass detector response to all compounds, and assuming PAC units of ppm for illustrative purposes. All ODTs presented in this table are human olfactory thresholds in air.
