# Supplementary material for: Characterizing the Smell of Marijuana by Odor Impact of Volatile Compounds: An Application of Simultaneous Chemical and Sensory Analysis
Source: PubMed Central journal article supplement (PMC4684335; doi:10.1371/journal.pone.0144160), 2015-12-10
Supplement: pone.0144160.s008.pdf [file pone.0144160.s008.pdf]

**Table S3. Summary of VOC emitted from unpackaged marijuana into headspace and captured by SPME during 5 min, 1 h, 68 h static sampling at room temperature.**

| Compound                 | CAS        | Ext. Time | Peak # | RT (min) | Models                                        | Net % Match | Published Descriptors    |                                      | Published ODT (ppm)     |                   | Surrogate Conc. (PAC) | OAV      |
|--------------------------|------------|-----------|--------|----------|-----------------------------------------------|-------------|--------------------------|--------------------------------------|-------------------------|-------------------|-----------------------|----------|
|                          |            |           |        |          |                                               |             | Flavornet[1]             | TGSC[2]                              | LRI & Odour Database[3] | Devos, et al. [4] |                       |          |
| Ethylene oxide           | 75-21-8    | 68 h      | 1      | 1.06     | 2: 44 46                                      | 66          |                          |                                      |                         | 8.51E+02          | 1.13E+06              | 1.33E+03 |
| Butyl formate            | 592-84-7   | 1 h       | 1      | 1.13     | 3: 41 39 56                                   | 65          |                          | Fruity                               |                         |                   | 2.32E+04              |          |
|                          |            | 68 h      | 2      | 1.13     | 2: 39 56                                      | 67          |                          | Fruity                               |                         |                   | 8.34E+03              |          |
| Acetaldehyde             | 75-07-0    | 1 h       | 2      | 1.20     | 2: 43 42                                      | 88          | Pungent, Ether           | Pungent, Ethereal, Aldehydic, Fruity |                         | 1.86E-01          | 8.62E+03              | 4.63E+04 |
| Isobutane                | 75-28-5    | 5 min     | 1      | 1.23     | 12: 43 42 41 57<br>72 39 50 55 58<br>54 56 37 | 84          |                          |                                      |                         | 1.00E+01          | 1.21E+06              | 1.21E+05 |
|                          |            | 68 h      | 3      | 1.24     | 9: 43 42 41 56 71 85<br>53 61 37 58           |             |                          |                                      |                         | 1.00E+01          | 2.27E+06              | 2.27E+05 |
|                          |            | 1 h       | 3      | 1.24     | 10: 43 42 41 57<br>39 72 55 56 73<br>37       | 85          |                          |                                      |                         | 1.00E+01          | 2.94E+06              | 2.94E+05 |
| Methyl mercaptan         | 74-93-1    | 68 h      | 4      | 1.27     | 3: 47 48 45                                   | 84          | Sulfur, Gasoline, Garlic | Decomposing, Cabbage, Garlic         |                         |                   | 1.13E+04              |          |
| Isoprene                 | 78-79-5    | 68 h      | 5      | 1.33     | 3: 67 68 39                                   | 86          |                          |                                      |                         |                   | 5.78E+04              |          |
| 2-methylpentane          | 107-83-5   | 1 h       | 4      | 1.34     | TIC                                           | 93          |                          |                                      |                         |                   | 3.12E+04              |          |
|                          |            | 5 min     | 2      | 1.39     | 3: 71 43 42                                   | 97          |                          |                                      |                         |                   | 2.82E+05              |          |
|                          |            | 1 h       | 5      | 1.40     | 12: 42 41 55 39<br>69 72 70 86 56<br>40 65 50 | 97          |                          |                                      |                         |                   | 6.18E+05              |          |
| 3,4,5-trimethyl-1-hexene | 56728-10-0 | 68 h      | 6      | 1.40     | 10: 43 41 71 70<br>42 57 55 39 86<br>56       | 97          |                          |                                      |                         |                   | 3.99E+05              |          |
|                          |            | 5 min     | 3      | 1.40     | 4: 41 86 39 70                                | 68          |                          |                                      |                         |                   | 2.59E+05              |          |
|                          |            | 1 h       | 6      | 1.40     | TIC                                           | 67          |                          |                                      |                         |                   | 6.20E+05              |          |
| 2,3,4-trimethylpentane   | 565-75-3   | 1 h       | 7      | 1.40     | 9: 43 70 41 55 57 77<br>53 56 54 50           |             |                          |                                      |                         | 2.03E+05          |                       |          |
| 3-methylpentane          | 96-14-0    | 5 min     | 4      | 1.45     | 2: 56 57                                      | 86          |                          |                                      |                         |                   | 7.49E+04              |          |
|                          |            | 68 h      | 7      | 1.45     | TIC                                           | 93          |                          |                                      |                         |                   | 5.09E+04              |          |

| Compound          | CAS      | Ext. Time | Peak # | RT (min) | Models                               | Net % Match | Published Descriptors     |                                                                       | Published ODT (ppm)     |                   | Surrogate   |          |
|-------------------|----------|-----------|--------|----------|--------------------------------------|-------------|---------------------------|-----------------------------------------------------------------------|-------------------------|-------------------|-------------|----------|
|                   |          |           |        |          |                                      |             | Flavornet[1]              | TGSC[2]                                                               | LRI & Odour Database[3] | Devos, et al. [4] | Conc. (PAC) | OAV      |
|                   |          | 1 h       | 8      | 1.46     | TIC                                  | 97          |                           |                                                                       |                         |                   | 1.22E+05    |          |
| 2-methylaziridine | 75-55-8  | 1 h       | 9      | 1.46     | 5: 57 56 41 53 39 81                 |             |                           |                                                                       |                         |                   | 1.67E+05    |          |
| Dimethylsulfide   | 75-18-3  | 1 h       | 10     | 1.51     | 5: 46 45 47 61 35 94                 |             | Cabbage, Sulfur, Gasoline | Sulfury, Onion, Sweet corn, Vegetable, Cabbage, Tomato, Green, Radish |                         | 2.24E-03          | 9.43E+04    | 4.21E+07 |
|                   |          | 68 h      | 8      | 1.51     | 1: 47                                | 88          | Cabbage, Sulfur, Gasoline | Sulfury, Onion, Sweet corn, Vegetable, Cabbage, Tomato, Green, Radish |                         | 2.24E-03          | 4.04E+04    | 1.80E+07 |
| Propanal          | 123-38-6 | 1 h       | 11     | 1.57     | TIC                                  | 76          | Solvent, Pungent          | Earthy, Alcohol, Wine, Whiskey, Cocoa, Nutty                          |                         | 2.69E-02          | 3.30E+04    | 1.23E+06 |
|                   |          | 68 h      | 9      | 1.57     | 1: 58                                | 75          | Solvent, Pungent          | Earthy, Alcohol, Wine, Whiskey, Cocoa, Nutty                          |                         | 2.69E-02          | 4.70E+04    | 1.75E+06 |
| Butane            | 106-97-8 | 1 h       | 12     | 1.65     | 5: 41 59 44 37 60 84                 |             |                           |                                                                       |                         | 2.04E+02          | 1.88E+06    | 9.21E+03 |
| Acetone           | 67-64-1  | 5 min     | 5      | 1.65     | TIC                                  | 83          |                           | Solvent                                                               |                         | 1.45E+01          | 7.16E+04    | 4.95E+03 |
|                   |          | 1 h       | 13     | 1.66     | 10: 43 58 42 39 99 41 38 37 44 36 59 |             |                           | Solvent                                                               |                         | 1.45E+01          | 4.98E+06    | 3.45E+05 |
|                   |          | 68 h      | 10     | 1.65     | 6: 43 58 42 39 41 99 44              |             |                           | Solvent                                                               |                         | 1.45E+01          | 1.97E+06    | 1.36E+05 |
| Isobutyraldehyde  | 78-84-2  | 1 h       | 14     | 1.77     | TIC                                  | 88          | Pungent, Malt, Green      | Spicy                                                                 |                         | 4.07E-02          | 1.52E+04    | 3.73E+05 |

| Compound                       | CAS         | Ext. Time | Peak # | RT (min) | Models                                      | Net % Match | Published Descriptors            |                       | Published ODT (ppm)     |                   | Surrogate Conc. |          |
|--------------------------------|-------------|-----------|--------|----------|---------------------------------------------|-------------|----------------------------------|-----------------------|-------------------------|-------------------|-----------------|----------|
|                                |             |           |        |          |                                             |             | Flavornet[1]                     | TGSC[2]               | LRI & Odour Database[3] | Devos, et al. [4] | (PAC)           | OAV      |
| Methacrolein                   | 78-85-3     | 1 h       | 15     | 2.14     | TIC                                         | 87          |                                  | Wild hyacinth foliage |                         |                   | 3.42E+04        |          |
|                                |             | 68 h      | 11     | 2.13     | TIC                                         | 96          |                                  | Wild hyacinth foliage |                         |                   | 1.13E+05        |          |
| Ethanol                        | 64-17-5     | 5 min     | 6      | 2.33     | 2: 45 46                                    | 95          | Sweet                            | Alcoholic             |                         | 2.88E+01          | 1.70E+05        | 5.90E+03 |
|                                |             | 1 h       | 16     | 2.33     | 6: 45 46 39 42 41 99 47                     | 95          | Sweet                            | Alcoholic             |                         | 2.88E+01          | 3.01E+05        | 1.04E+04 |
| Methylene chloride             | 75-09-2     | 68 h      | 12     | 2.34     | 2: 45 42                                    | 91          | Sweet                            | Alcoholic             |                         | 2.88E+01          | 3.02E+05        | 1.05E+04 |
|                                |             | 1 h       | 17     | 2.42     | 5: 84 39 86 88 47 95                        | 95          |                                  |                       |                         | 2.82E+01          | 7.08E+04        | 2.51E+03 |
| Pentanal                       | 110-62-3    | 68 h      | 13     | 3.66     | TIC                                         | 68          | Almond, Malt, Pungent            | Fermented             |                         | 6.03E-03          | 9.80E+03        | 1.63E+06 |
| tert-butanol                   | 75-65-0     | 5 min     | 8      | 3.94     | TIC                                         | 75          |                                  | Camphor               |                         |                   | 3.37E+04        |          |
|                                |             | 68 h      | 14     | 3.92     | 5: 33 43 59 40 57 77                        | 77          |                                  | Camphor               |                         |                   | 4.49E+05        |          |
| 3-pentanol                     | 584-02-1    | 1 h       | 19     | 3.92     | TIC                                         | 71          | Fruit                            | Herbal                |                         | 4.68E-01          | 1.21E+05        | 2.58E+05 |
| Ethylenediamine                | 107-15-3    | 5 min     | 7      | 3.93     | TIC                                         | 76          |                                  |                       |                         |                   | 1.94E+05        |          |
|                                |             | 5 min     | 9      | 3.94     | TIC                                         | 79          |                                  |                       |                         |                   | 9.60E+04        |          |
| 1,1-dimethyl-hydrazine         | 57-14-7     | 1 h       | 18     | 3.91     | TIC                                         | 83          |                                  |                       |                         |                   | 1.41E+05        |          |
|                                |             | 68 h      | 15     | 3.93     | 3: 60 58 45                                 | 91          |                                  |                       |                         |                   | 1.01E+05        |          |
| Hydrazine                      | 302-01-2    | 5 min     | 10     | 3.96     | 2: 33 61                                    | 77          |                                  | Ammoniacal            |                         | 3.00E+00          | 3.41E+03        | 1.14E+03 |
|                                |             | 1 h       | 20     | 3.92     | 3: 33 45 37                                 | 77          |                                  |                       |                         | 3.00E+00          | 4.44E+03        | 1.48E+03 |
| Hexanal                        | 66-25-1     | 68 h      | 16     | 3.93     | 2: 33 61                                    | 77          |                                  |                       |                         | 3.00E+00          | 1.03E+04        | 3.42E+03 |
|                                |             | 1 h       | 21     | 5.99     | TIC                                         | 84          | Grass, Tallow, Fat               | Green                 |                         | 1.38E-02          | 3.44E+04        | 2.49E+06 |
| 1-butanol                      | 71-36-3     | 68 h      | 17     | 5.98     | 9: 41 43 56 44 55 96 57 40 50 54            | 96          | Grass, Tallow, Fat               | Green                 |                         | 1.38E-02          | 7.43E+05        | 5.39E+07 |
|                                |             | 68 h      | 18     | 6.12     | TIC                                         | 91          | Medicine, Fruit                  | Fermented             |                         | 4.90E-01          | 4.11E+04        | 8.39E+04 |
| Nonane                         | 111-84-2    | 68 h      | 19     | 6.68     | TIC                                         | 87          | Alkane                           | Gasoline              |                         | 1.26E+00          | 4.14E+04        | 3.29E+04 |
| 2-isopropenyl-3-methylpyrazine | 145984-65-2 | 1 h       | 22     | 7.67     | 4: 135 75 134 133                           | 73          |                                  |                       |                         |                   | 1.03E+05        |          |
| $\alpha$ -phellandrene         | 99-83-2     | 5 min     | 12     | 7.89     | TIC                                         | 82          | Turpentine, Mint, Terpenic Spice |                       |                         |                   | 2.36E+04        |          |
|                                |             | 1 h       | 25     | 7.90     | 11: 92 136 91 93 79 108 78 39 77 107 106 66 | 79          | Turpentine, Mint, Terpenic Spice |                       |                         |                   | 1.55E+06        |          |

| Compound                      | CAS        | Ext. Time | Peak # | RT (min) | Models                                                 | Net % Match | Published Descriptors          |                                                      | Published ODT (ppm)     |                   | Surrogate Conc. |          |
|-------------------------------|------------|-----------|--------|----------|--------------------------------------------------------|-------------|--------------------------------|------------------------------------------------------|-------------------------|-------------------|-----------------|----------|
|                               |            |           |        |          |                                                        |             | Flavornet[1]                   | TGSC[2]                                              | LRI & Odour Database[3] | Devos, et al. [4] | (PAC)           | OAV      |
| (+)-4-Carene                  | 29050-33-7 | 1 h       | 23     | 7.90     | 13: 121 78 136<br>68 103 117 80 52<br>51 77 106 107 81 | 82          |                                |                                                      | 4.00E+00                |                   | 2.20E+05        | 5.49E+04 |
| Sabinene                      | 3387-41-5  | 1 h       | 26     | 7.92     | 7: 91 67 107 108<br>41 94 63                           | 69          | Pepper,<br>Turpentine,<br>Wood | Woody                                                |                         |                   | 1.09E+05        |          |
| $\gamma$ -terpinene           | 99-85-4    | 1 h       | 27     | 7.92     | 7: 77 107 80 121<br>92 137 63                          | 69          | Gasoline,<br>Turpentine        | Terpenic                                             |                         |                   | 1.64E+05        |          |
| $\alpha$ -pinene              | 80-56-8    | 5 min     | 11     | 7.89     | TIC                                                    | 79          | Pine, Turpentine               | Herbal                                               |                         | 6.92E-01          | 2.36E+04        | 3.41E+04 |
|                               |            | 1 h       | 24     | 7.90     | 11: 92 136 91 93<br>108 78 39 77 107<br>106 66         | 97          | Pine, Turpentine               | Herbal                                               |                         | 6.92E-01          | 4.88E+05        | 7.05E+05 |
|                               |            | 68 h      | 20     | 7.92     | 7: 80 91 121 92<br>79 105 107                          | 93          | Pine, Turpentine               | Herbal                                               |                         | 6.92E-01          | 1.88E+05        | 2.71E+05 |
| 2-heptanone                   | 110-43-0   | 68 h      | 21     | 8.44     | TIC                                                    | 90          | Soap                           | Cheesy                                               |                         | 1.41E-01          | 2.35E+05        | 1.66E+06 |
| Heptanal                      | 111-71-7   | 68 h      | 22     | 8.61     | TIC                                                    | 97          | Fat, Citrus,<br>Rancid         | Green                                                |                         | 4.79E-03          | 1.90E+06        | 3.97E+08 |
| 4-methylpyrimidine            | 3438-46-8  | 68 h      | 23     | 9.05     | TIC                                                    | 90          |                                |                                                      |                         |                   | 7.71E+04        |          |
| 4-pyridinamine                | 504-24-5   | 68 h      | 24     | 9.05     | 4: 67 52 53 41                                         | 86          |                                |                                                      |                         |                   | 1.03E+05        |          |
| 1,3,5-triazine-2,4,6-triamine | 108-78-1   | 5 min     | 13     | 9.26     | 2: 126 84                                              | 68          |                                |                                                      |                         |                   | 4.66E+03        |          |
| Styrene                       | 100-42-5   | 68 h      | 25     | 9.42     | 3: 104 102 50                                          | 92          | Balsamic,<br>Gasoline          | Balsamic                                             |                         | 1.45E-01          | 1.32E+05        | 9.11E+05 |
| Myrcene                       | 123-35-3   | 1 h       | 28     | 9.92     | TIC                                                    | 94          | Balsamic, Must,<br>Spice       | Peppery,<br>Terpene,<br>Spicy,<br>Balsam,<br>Plastic | 1.30E-02                |                   | 6.11E+05        | 4.70E+07 |
|                               |            | 68 h      | 26     | 9.93     | 9: 137 50 117<br>103 74 89 51 58<br>138                | 96          | Balsamic, Must,<br>Spice       | Peppery,<br>Terpene,<br>Spicy,<br>Balsam,<br>Plastic | 1.30E-02                |                   | 9.74E+06        | 7.49E+08 |
| $\beta$ -pinene               | 18172-67-3 | 68 h      | 27     | 9.94     | TIC                                                    | 97          | Pine, Resin,<br>Turpentine     | Terpenic                                             |                         |                   | 1.62E+07        |          |

| Compound                | CAS        | Ext. Time | Peak # | RT (min) | Models                                      | Net % Match | Published Descriptors                    |                                                        | Published ODT (ppm)     |                   | Surrogate   |     |
|-------------------------|------------|-----------|--------|----------|---------------------------------------------|-------------|------------------------------------------|--------------------------------------------------------|-------------------------|-------------------|-------------|-----|
|                         |            |           |        |          |                                             |             | Flavornet[1]                             | TGSC[2]                                                | LRI & Odour Database[3] | Devos, et al. [4] | Conc. (PAC) | OAV |
| Dimethylpyrazine        | 123-32-0   | 68 h      | 28     | 10.61    | TIC                                         | 70          | Cocoa, Roasted nut, Roast beef, Medicine | Cocoa, Roasted nuts, Roast Beef, Woody, Grass, Medical |                         |                   | 6.43E+03    |     |
| 1-hexanol               | 111-27-3   | 68 h      | 29     | 10.73    | 4: 42 56 41 84                              | 80          | Resin, Flower, Breen                     | Herbal                                                 | 4.37E-02                | 2.08E+05          | 4.75E+06    |     |
| Diacetone alcohol       | 123-42-2   | 1 h       | 29     | 10.80    | 2: 59 43                                    | 77          |                                          |                                                        | 8.91E-01                | 5.51E+04          | 6.18E+04    |     |
|                         |            | 68 h      | 30     | 10.80    | 1: 101                                      | 71          |                                          |                                                        | 8.91E-01                | 8.98E+04          | 1.01E+05    |     |
| Camphene                | 79-92-5    | 1 h       | 30     | 10.89    | 7: 79 68 136 107 92 95 91                   | 84          | Camphor                                  | Woody                                                  |                         |                   | 1.33E+05    |     |
|                         |            | 68 h      | 32     | 10.89    | TIC                                         | 89          | Camphor                                  | Woody                                                  |                         |                   | 1.23E+06    |     |
| Limonene                | 138-86-3   | 1 h       | 31     | 10.90    | 6: 68 92 80 136 69 41                       | 90          | Lemon, Orange                            | Citrus                                                 | 4.37E-01                | 1.71E+05          | 3.92E+05    |     |
|                         |            | 68 h      | 31     | 10.89    | TIC                                         | 95          | Lemon, Orange                            | Citrus                                                 | 4.37E-01                | 1.23E+06          | 2.83E+06    |     |
| Octanal                 | 124-13-0   | 68 h      | 33     | 11.20    | TIC                                         | 85          | Fat, Soap, Lemon, Green                  | Aldehydic, Waxy, Citrus, Orange peel, Green, Fatty     | 1.35E-03                | 1.07E+05          | 7.96E+07    |     |
| m-cymene                | 535-77-3   | 1 h       | 32     | 11.36    | TIC                                         | 86          |                                          |                                                        |                         |                   | 3.49E+04    |     |
|                         |            | 68 h      | 34     | 11.37    | TIC                                         | 92          |                                          |                                                        |                         |                   | 1.22E+05    |     |
| Methylisohexenyl ketone | 110-93-0   | 1 h       | 33     | 11.54    | TIC                                         | 80          | Pepper, Mushroom, Rubber                 | Citrus                                                 | 3.80E-02                | 4.51E+04          | 1.19E+06    |     |
|                         |            | 68 h      | 35     | 11.52    | 13: 93 58 67 111 56 71 42 53 38 82 54 44 70 | 97          | Pepper, Mushroom, Rubber                 | Citrus                                                 | 3.80E-02                | 1.48E+06          | 3.90E+07    |     |
| δ-3-carene              | 13466-78-9 | 68 h      | 36     | 11.62    | TIC                                         | 97          | Lemon, Resin                             | Citrus                                                 | 4.00E+00                | 1.49E+06          | 3.72E+05    |     |
| 2-butoxyethanol         | 111-76-2   | 68 h      | 37     | 11.75    | 7: 45 87 41 42 75 89 39 88                  | 89          |                                          |                                                        | 3.39E-01                | 1.41E+05          | 4.16E+05    |     |
| Undecane                | 1120-21-4  | 68 h      | 38     | 11.87    | TIC                                         | 92          | Alkane                                   |                                                        | 1.17E+00                | 1.31E+05          | 1.12E+05    |     |
| Acetic acid             | 64-19-7    | 1 h       | 34     | 12.25    | 3: 43 44 207                                | 100         | Sour                                     | Acidic                                                 | 1.45E-01                | 7.66E+05          | 5.30E+06    |     |
|                         |            | 68 h      | 39     | 12.21    | 7: 43 45 60 44 40 99 207 59                 | 99          | Sour                                     | Acidic                                                 | 1.45E-01                | 6.49E+06          | 4.49E+07    |     |

| Compound                      | CAS       | Ext. Time | Peak # | RT (min) | Models                                                              | Net % Match | Published Descriptors |                                   | Published ODT (ppm)     |                   | Surrogate   |          |
|-------------------------------|-----------|-----------|--------|----------|---------------------------------------------------------------------|-------------|-----------------------|-----------------------------------|-------------------------|-------------------|-------------|----------|
|                               |           |           |        |          |                                                                     |             | Flavornet[1]          | TGSC[2]                           | LRI & Odour Database[3] | Devos, et al. [4] | Conc. (PAC) | OAV      |
| Furfural                      | 98-01-1   | 68 h      | 40     | 12.68    | 2: 96 39                                                            | 96          | Bread, Almond, Sweet  | Sweet, Woody, Almond, Baked bread |                         | 7.76E-01          | 1.64E+05    | 2.11E+05 |
| Citronellolformate            | 105-85-1  | 68 h      | 41     | 13.08    | 7: 120 41 92 96 93 109 138                                          | 71          |                       | Floral                            |                         |                   | 4.20E+05    |          |
| 1,3-dichlorobenzene           | 541-73-1  | 68 h      | 42     | 13.15    | 6: 75 111 84 76 150 147                                             | 97          |                       |                                   |                         |                   | 3.07E+05    |          |
| 2-ethylhexanol                | 104-76-7  | 1 h       | 35     | 13.80    | 7: 84 41 54 112 43 56 70                                            | 91          | Rose, Green           | Citrus                            |                         | 2.45E-01          | 3.39E+05    | 1.38E+06 |
| 2-ethenyl-1,3-dimethylbenzene | 2039-90-9 | 68 h      | 43     | 13.83    | TIC                                                                 | 92          | Rose, Green           | Citrus                            |                         | 2.45E-01          | 1.28E+06    | 5.22E+06 |
|                               |           | 68 h      | 44     | 13.93    | 4: 104 89 117 115                                                   | 81          |                       |                                   |                         |                   | 6.28E+04    |          |
| Benzaldehyde                  | 100-52-7  | 5 min     | 15     | 14.11    | 2: 106 77                                                           | 87          | Almond, Burnt sugar   | Fruity                            |                         | 4.17E-02          | 4.75E+04    | 1.14E+06 |
|                               |           | 1 h       | 36     | 14.06    | TIC                                                                 | 98          | Almond, Burnt sugar   | Fruity                            |                         | 4.17E-02          | 1.00E+06    | 2.40E+07 |
|                               |           | 68 h      | 45     | 14.05    | 14: 106 105 51 78 107 52 74 39 75 79 63 37 108 36                   | 99          | Almond, Burnt sugar   | Fruity                            |                         | 4.17E-02          | 3.24E+07    | 7.76E+08 |
| 2-chloroacetophenone          | 532-27-4  | 5 min     | 14     | 14.09    | 2: 105 52                                                           | 68          |                       |                                   |                         | 2.57E-02          | 2.00E+04    | 7.80E+05 |
| Dodecane                      | 112-40-3  | 68 h      | 46     | 14.19    | 8: 170 98 84 85 127 147 58 269                                      | 68          | Alkane                | Alkane                            |                         | 2.04E+00          | 4.12E+05    | 2.02E+05 |
| 1-(3-methylphenyl)-ethanone   | 585-74-0  | 68 h      | 47     | 14.46    | TIC                                                                 | 85          |                       |                                   |                         |                   | 3.97E+04    |          |
| tert-butyl-benzene            | 98-06-6   | 68 h      | 48     | 14.48    | 8: 79 117 119 78 87 134 135 92 120                                  |             |                       |                                   |                         |                   | 1.37E+05    |          |
| Linalool                      | 78-70-6   | 1 h       | 37     | 15.12    | 20: 93 69 80 71 72 122 41 92 55 107 136 65 94 53 81 105 45 56 96 82 | 95          | Flower, Lavender      | Floral                            |                         | 5.37E-02          | 3.68E+05    | 6.85E+06 |

| Compound                  | CAS        | Ext. Time | Peak # | RT (min) | Models                                                                          | Net % Match | Published Descriptors       |                                                            | Published ODT (ppm)     |                   | Surrogate   |          |
|---------------------------|------------|-----------|--------|----------|---------------------------------------------------------------------------------|-------------|-----------------------------|------------------------------------------------------------|-------------------------|-------------------|-------------|----------|
|                           |            |           |        |          |                                                                                 |             | Flavornet[1]                | TGSC[2]                                                    | LRI & Odour Database[3] | Devos, et al. [4] | Conc. (PAC) | OAV      |
|                           |            | 68 h      | 50     | 15.13    | 20: 41 43 69 121<br>80 106 67 83 92<br>39 94 79 72 97<br>68 136 57 96 82<br>107 | 98          | Flower, Lavender            | Floral                                                     | 5.37E-02                | 3.65E+06          | 6.79E+07    |          |
| Isobornyl thiocynoacetate | 115-31-1   | 68 h      | 49     | 15.12    | 15: 39 96 109<br>154 42 56 84 95<br>65 85 139 58 54<br>44 57                    | 73          |                             |                                                            |                         |                   |             | 2.51E+06 |
| cis-2-pinanol             | 4948-29-2  | 1 h       | 38     | 15.41    | TIC                                                                             | 79          |                             | Herbal                                                     |                         |                   |             | 1.66E+04 |
| Benzonitrile              | 100-47-0   | 68 h      | 51     | 15.47    | 2: 103 91                                                                       | 80          | Rancid, Sweet               |                                                            |                         |                   |             | 1.56E+05 |
| $\alpha$ -ionol           | 25312-34-9 | 68 h      | 52     | 15.66    | 19: 138 95 67 79<br>43 39 86 77 123<br>42 96 91 139 41<br>93 71 55 137 44       | 80          |                             | Ionone,<br>Tropical,<br>Sweet, Floral,<br>Violet,<br>Woody |                         |                   |             | 1.08E+06 |
| Fenchyl alcohol           | 1632-73-1  | 1 h       | 39     | 15.73    | TIC                                                                             | 72          | Camphor                     | Camphor,<br>Borneol, Pine,<br>Woody, Dry,<br>Sweet, Lemon  |                         |                   |             | 1.94E+04 |
| 2-ethoxyethanol           | 110-80-5   | 68 h      | 53     | 15.79    | 3: 104 59 72                                                                    | 67          |                             |                                                            | 1.23E+00                | 1.06E+05          | 8.63E+04    |          |
| Decanal                   | 112-31-2   | 68 h      | 54     | 15.89    | TIC                                                                             | 84          | Soap, Orange peel, Tallow   | Aldehydic                                                  | 8.91E-04                | 1.45E+05          | 1.63E+08    |          |
| Methyl heptadienone       | 1604-28-0  | 68 h      | 55     | 15.91    | TIC                                                                             | 86          |                             | Cinnamon,<br>Coconut,<br>Spice,<br>Woody,<br>Sweet, Weedy  |                         |                   |             | 7.94E+04 |
| Methyl benzoate           | 93-58-3    | 68 h      | 56     | 16.25    | 1: 105                                                                          | 82          | Prune, Lettuce, Herb, Sweet | Phenolic                                                   | 1.07E-01                | 3.90E+04          | 3.64E+05    |          |
| Tridecane                 | 629-50-5   | 68 h      | 57     | 16.35    | 4: 70 84 73 56                                                                  | 82          | Alkane                      | Alkane                                                     | 2.14E+00                | 1.38E+05          | 6.47E+04    |          |
| Acetophenone              | 98-86-2    | 68 h      | 58     | 16.51    | 3: 105 90 106                                                                   | 87          | Musty, Flower, Almond       | Floral                                                     | 3.63E-01                | 7.91E+04          | 2.18E+05    |          |
| Salicyladehyde            | 90-02-8    | 68 h      | 59     | 16.81    | TIC                                                                             | 67          |                             | Medicinal                                                  | 7.41E-03                | 2.70E+04          | 3.64E+06    |          |
| Benzyl formate            | 104-57-4   | 68 h      | 60     | 17.04    | 6: 91 136 90 89<br>78 51                                                        | 92          |                             | Floral                                                     |                         |                   |             | 1.69E+05 |

| Compound                | CAS      | Ext. Time | Peak # | RT (min) | Models                                    | Net % Match | Published Descriptors   |                                       | Published ODT (ppm)     |                   | Surrogate   |          |
|-------------------------|----------|-----------|--------|----------|-------------------------------------------|-------------|-------------------------|---------------------------------------|-------------------------|-------------------|-------------|----------|
|                         |          |           |        |          |                                           |             | Flavornet[1]            | TGSC[2]                               | LRI & Odour Database[3] | Devos, et al. [4] | Conc. (PAC) | OAV      |
| 2-methyl-1H-imidazole   | 693-98-1 | 68 h      | 61     | 17.12    | 3: 82 97 54                               | 82          |                         |                                       |                         |                   |             | 3.89E+04 |
| $\alpha$ -terpineol     | 98-55-5  | 1 h       | 40     | 17.73    | TIC                                       | 80          | Oil, Anise, Mint        | Floral                                |                         | 3.72E-02          | 2.54E+04    | 6.84E+05 |
|                         |          | 68 h      | 62     | 17.73    | 8: 121 68 81 136 107 77 109 69            | 93          | Oil, Anise, Mint        | Floral                                |                         | 3.72E-02          | 9.94E+05    | 2.68E+07 |
| Acetamide               | 60-35-5  | 68 h      | 63     | 17.89    | 10: 146 69 128 117 120 45 115 105 161 134 | 87          |                         | Mousy                                 |                         | 6.03E+01          | 3.78E+05    | 6.28E+03 |
| Benzyl acetate          | 140-11-4 | 68 h      | 64     | 18.03    | 9: 150 109 108 91 79 107 51 50 83         | 94          | Fresh, Boiled vegetable | Sweet, Floral, Fruity, Jasmine, Fresh |                         | 1.45E-01          | 2.68E+05    | 1.85E+06 |
| m-tert-butylphenol      | 585-34-2 | 1 h       | 41     | 18.15    | 5: 135 80 108 79 91                       | 68          |                         |                                       |                         |                   |             | 6.76E+04 |
|                         |          | 68 h      | 65     | 18.15    | 8: 108 107 79 91 150 115 39 110           | 69          |                         |                                       |                         |                   |             | 2.05E+04 |
| p-tert-butylphenol      | 98-54-4  | 1 h       | 42     | 18.15    | TIC                                       | 68          |                         | Leathery                              |                         |                   |             | 1.54E+04 |
| Verbenone               | 80-57-9  | 1 h       | 43     | 18.16    | TIC                                       | 82          |                         | Camphor, Menthol, Celery              |                         |                   |             | 2.55E+04 |
|                         |          | 68 h      | 66     | 18.16    | 8: 107 91 149 55 146 150 73 108           | 68          |                         | Camphor, Menthol, Celery              |                         |                   |             | 5.53E+04 |
| DL-carvone              | 99-49-0  | 68 h      | 67     | 18.68    | 4: 107 82 54 93                           | 82          | Mint, Basil, Fennel     | Minty, Licorice                       |                         | 2.24E-02          | 1.56E+05    | 6.97E+06 |
| Methyl acetylsalicylate | 580-02-9 | 68 h      | 68     | 18.86    | 4: 82 125 120 43                          | 90          |                         |                                       |                         |                   |             | 5.82E+04 |
| Methyl salicylate       | 119-36-8 | 68 h      | 69     | 18.87    | 5: 120 152 121 43 63                      | 88          | Peppermint              | Minty                                 |                         | 4.37E-02          | 1.09E+05    | 2.50E+06 |
| $\beta$ -caryophyllene  | 87-44-5  | 5 min     | 16     | 19.67    | TIC                                       | 92          | Wood, Spice             | Spice                                 | 6.40E-02                |                   | 3.14E+05    | 4.91E+06 |
|                         |          | 1 h       | 44     | 19.65    | 10: 134 124 96 66 112 190 122 110 177 138 | 89          | Wood, Spice             | Spice                                 | 6.40E-02                |                   | 1.05E+06    | 1.64E+07 |



| Compound              | CAS       | Ext. Time | Peak # | RT (min) | Models                                                                                  | Net % Match                  | Published Descriptors     |                  | Published ODT (ppm)     |                   | Surrogate   |          |
|-----------------------|-----------|-----------|--------|----------|-----------------------------------------------------------------------------------------|------------------------------|---------------------------|------------------|-------------------------|-------------------|-------------|----------|
|                       |           |           |        |          |                                                                                         |                              | Flavornet[1]              | TGSC[2]          | LRI & Odour Database[3] | Devos, et al. [4] | Conc. (PAC) | OAV      |
|                       |           | 68 h      | 70     | 19.69    | 20: 133 93 69<br>120 41 147 148<br>67 189 81 94 95<br>175 82 135 162<br>137 129 122 136 | 80                           | Wood, Spice               | Spice            | 6.40E-02                |                   | 5.25E+06    | 8.20E+07 |
| (+)-sativene          | 3650-28-0 | 68 h      | 71     | 19.72    | 3: 105 86 37                                                                            | 73                           |                           |                  |                         |                   | 1.40E+07    |          |
| Tyramine              | 51-67-2   | 5 min     | 18     | 19.74    | 3: 80 51 49                                                                             | 70                           |                           | Meaty            |                         |                   | 6.64E+05    |          |
|                       |           | 1 h       | 46     | 19.73    | 5: 90 62 109 37                                                                         | 70                           |                           | Meaty            |                         |                   | 3.71E+06    |          |
|                       |           |           |        |          |                                                                                         | 61                           |                           |                  |                         |                   |             |          |
| Benzyl Alcohol        | 100-51-6  | 5 min     | 17     | 19.73    | 5: 90 80 91 51 74 97                                                                    |                              | Sweet, Flower             | Floral           |                         |                   | 5.67E+05    |          |
|                       |           | 1 h       | 45     | 19.72    | TIC                                                                                     | 96                           | Sweet, Flower             | Floral           |                         |                   | 5.83E+06    |          |
|                       |           | 68 h      | 72     | 19.79    | 11: 79 107 51 91 100<br>63 109 74 49 40<br>48 155                                       |                              | Sweet, Flower             | Floral           |                         |                   | 1.86E+08    |          |
| $\alpha$ -terpinene   | 99-86-5   | 68 h      | 73     | 19.98    | 15: 121 109 122<br>136 161 162 123<br>41 120 107 81 91<br>190 204 92                    | 67                           | Lemon                     | Woody            |                         |                   | 2.09E+05    |          |
|                       |           |           |        |          |                                                                                         |                              |                           |                  |                         |                   |             |          |
|                       |           |           |        |          |                                                                                         |                              |                           |                  |                         |                   |             |          |
| $\alpha$ -longipinene | 5989-08-2 | 68 h      | 74     | 20.01    | 4: 119 109 91 40                                                                        | 73                           |                           |                  |                         |                   | 4.73E+05    |          |
|                       |           | 1 h       | 47     | 20.11    | 2: 94 79                                                                                | 80                           | Sulfur, Burnt             | Sulfurous, Burnt |                         |                   | 1.93E+04    |          |
|                       |           |           | 68 h   | 75       | 20.10                                                                                   | 7: 94 81 82 54<br>119 46 150 | 82                        | Sulfur, Burnt    | Sulfurous, Burnt        |                   |             | 1.54E+05 |
| Phenylethyl alcohol   | 60-12-8   | 68 h      | 76     | 20.39    | 5: 91 122 92 44<br>57                                                                   | 82                           | Honey, Spice, Rose, Lilac | Floral           |                         | 1.70E-02          | 4.72E+04    | 2.78E+06 |
| 2-methyl naphthalene  | 91-57-6   | 68 h      | 77     | 20.43    | 5: 141 139 115<br>205 147                                                               | 81                           |                           | Floral           |                         |                   | 6.87E+04    |          |
| $\alpha$ -humulene    | 6753-98-6 | 5 min     | 19     | 20.53    | TIC                                                                                     | 83                           | Wood                      | Wood             | 1.20E-01                |                   | 4.30E+04    | 3.58E+05 |
|                       |           | 1 h       | 48     | 20.52    | 19: 92 79 94 105<br>95 91 148 63 65<br>204 120 41 123<br>82 135 78 66 39<br>128         | 97                           | Wood                      | Wood             | 1.20E-01                |                   | 1.42E+06    | 1.19E+07 |

| Compound            | CAS        | Ext. Time | Peak # | RT (min) | Models                                                                                   | Net % Match | Published Descriptors |          | Published ODT (ppm)     |                   | Surrogate Conc. |          |
|---------------------|------------|-----------|--------|----------|------------------------------------------------------------------------------------------|-------------|-----------------------|----------|-------------------------|-------------------|-----------------|----------|
|                     |            |           |        |          |                                                                                          |             | Flavornet[1]          | TGSC[2]  | LRI & Odour Database[3] | Devos, et al. [4] | (PAC)           | OAV      |
|                     |            | 68 h      | 78     | 20.56    | 20: 136 106 94<br>119 204 55 190<br>82 115 95 161 54<br>189 149 148 52<br>71 128 65 66   | 97          | Wood                  | Wood     | 1.20E-01                |                   | 5.44E+06        | 4.53E+07 |
| Benzyl nitrile      | 140-29-4   | 68 h      | 79     | 20.70    | 5: 51 117 112<br>118 77                                                                  | 88          |                       |          |                         |                   | 1.13E+05        |          |
| $\alpha$ -cubebene  | 17699-14-8 | 68 h      | 80     | 20.90    | TIC                                                                                      | 71          | Herb, Wax             | Herb     |                         |                   | 2.41E+04        |          |
| $\beta$ -selinene   | 17066-67-0 | 1 h       | 50     | 21.25    | 15: 161 162 134<br>94 190 43 91 81<br>204 121 123 95<br>92 131 175                       | 72          | Herb                  | Herb     |                         |                   | 1.56E+05        |          |
|                     |            | 68 h      | 82     | 21.26    | 20: 55 79 91 147<br>96 120 176 121<br>135 105 106 175<br>145 190 81 94<br>104 40 109 148 | 98          | Herb                  | Herb     |                         |                   | 3.65E+06        |          |
| $\alpha$ -gurjunene | 489-40-7   | 1 h       | 51     | 21.38    | 10: 147 131 107<br>133 109 204 119<br>79 95 105                                          | 81          | Wood, Balsamic        | Wood     |                         |                   | 1.34E+05        |          |
|                     |            | 68 h      | 81     | 21.11    | 13: 204 93 161<br>127 189 133 95<br>122 169 128 190<br>117 123                           | 89          | Wood, Balsamic        | Wood     |                         |                   | 4.08E+05        |          |
| $\beta$ -cedrene    | 546-28-1   | 68 h      | 83     | 21.41    | 20: 161 93 134<br>107 77 122 94 41<br>121 120 67 106<br>95 66 54 39 135<br>163 108 119   | 76          |                       |          |                         |                   | 1.62E+06        |          |
| Phenol              | 108-95-2   | 68 h      | 84     | 21.63    | 17: 94 66 65 47<br>62 95 63 64 40<br>38 74 90 55 61<br>49 53 36                          | 93          | Phenolic              | Phenolic | 1.10E-01                | 2.08E+06          | 1.89E+07        |          |
| Aromadendrene       | 489-39-4   | 1 h       | 49     | 21.25    | TIC                                                                                      | 91          | Wood                  | Wood     |                         |                   | 1.16E+05        |          |

| Compound            | CAS        | Ext. Time | Peak # | RT (min) | Models                                                                                   | Net % Match | Published Descriptors |                                  | Published ODT (ppm)     |                   | Surrogate Conc. (PAC) | OAV      |  |
|---------------------|------------|-----------|--------|----------|------------------------------------------------------------------------------------------|-------------|-----------------------|----------------------------------|-------------------------|-------------------|-----------------------|----------|--|
|                     |            |           |        |          |                                                                                          |             | Flavornet[1]          | TGSC[2]                          | LRI & Odour Database[3] | Devos, et al. [4] |                       |          |  |
|                     |            | 68 h      | 85     | 21.70    | 19: 121 204 189<br>83 120 105 148<br>122 147 91 79 93<br>107 119 95 134<br>157 54 103    | 77          | Wood                  | Wood                             |                         |                   | 1.81E+06              |          |  |
| $\alpha$ -guaiene   | 3691-12-1  | 68 h      | 86     | 21.71    | 20: 133 120 91<br>106 105 119 78<br>148 204 189 93<br>83 161 107 123<br>145 67 80 81 53  | 78          | Wood, Balsamic        | Wood                             |                         |                   | 7.32E+05              |          |  |
| $\alpha$ -cedrene   | 469-61-4   | 1 h       | 52     | 22.07    | TIC                                                                                      | 72          |                       | Woody,<br>Cedar, Sweet,<br>Fresh |                         |                   | 1.74E+04              |          |  |
|                     |            | 68 h      | 87     | 22.10    | 20: 93 119 79<br>204 107 94 95 77<br>136 69 81 189<br>120 39 205 122<br>106 161 148 133  | 74          |                       | Woody,<br>Cedar, Sweet,<br>Fresh |                         |                   | 6.98E+06              |          |  |
| Valencene           | 4630-07-3  | 5 min     | 20     | 22.18    | TIC                                                                                      | 76          | Green, Oil            | Citrus                           |                         |                   | 1.85E+04              |          |  |
|                     |            | 1 h       | 53     | 22.19    | TIC                                                                                      | 95          | Green, Oil            | Citrus                           |                         |                   | 8.47E+05              |          |  |
|                     |            | 68 h      | 88     | 22.21    | 19: 133 67 205<br>77 55 162 190<br>189 175 130 109<br>174 92 121 117<br>106 94 108 80    | 95          | Green, Oil            | Citrus                           |                         |                   | 1.39E+07              |          |  |
| $\gamma$ -gurjunene | 22567-17-5 | 1 h       | 54     | 22.27    | TIC                                                                                      | 89          |                       | Musty                            |                         |                   | 5.08E+05              |          |  |
|                     |            | 68 h      | 89     | 22.32    | 20: 122 105 91<br>121 81 41 149 55<br>123 190 65 175<br>129 104 103 73<br>51 173 163 150 | 92          |                       | Musty                            |                         |                   |                       | 4.82E+07 |  |

| Compound                       | CAS       | Ext. Time | Peak # | RT (min) | Models                                                                      | Net % Match | Published Descriptors |                                                                   | Published ODT (ppm)     |                   | Surrogate   |          |
|--------------------------------|-----------|-----------|--------|----------|-----------------------------------------------------------------------------|-------------|-----------------------|-------------------------------------------------------------------|-------------------------|-------------------|-------------|----------|
|                                |           |           |        |          |                                                                             |             | Flavornet[1]          | TGSC[2]                                                           | LRI & Odour Database[3] | Devos, et al. [4] | Conc. (PAC) | OAV      |
| Dimethylbenzylcarbinyl acetate | 151-05-3  | 68 h      | 90     | 22.41    | 6: 71 132 117 60 59 115                                                     | 65          |                       | Sweet, Floral, Fruity, Rose, Green, Pear, Berry, Jasmine, Powdery |                         |                   | 8.36E+05    |          |
| 2,6-dimethylquinoline          | 877-43-0  | 68 h      | 91     | 23.13    | 15: 157 142 127 136 156 200 155 135 158 115 152 128 129 153 126             | 70          |                       |                                                                   |                         |                   | 5.20E+05    |          |
| 2-phenoxyethanol               | 122-99-6  | 68 h      | 92     | 23.77    | 6: 94 77 66 147 65 71                                                       | 90          |                       | Mild, Rose, Balsam, Cinnamyl                                      |                         |                   | 1.63E+05    |          |
| Nerolidol                      | 7212-44-4 | 68 h      | 93     | 23.96    | 20: 41 119 81 136 71 95 121 67 79 105 123 91 135 80 108 163 190 109 53 124  | 83          | Wood, Flower, Wax     | Floral                                                            |                         |                   | 3.53E+06    |          |
| (+)-nerolidol                  | 142-50-7  | 68 h      | 94     | 23.97    | 20: 69 93 107 81 202 55 79 121 109 161 123 67 133 53 178 77 137 163 204 97  | 86          |                       | Floral                                                            |                         |                   | 3.42E+06    |          |
| Caryophyllene oxide            | 1139-30-6 | 68 h      | 95     | 24.09    | 20: 95 82 83 69 123 66 124 105 159 71 161 189 138 111 160 191 97 112 162 54 | 91          | Herb, Sweet, Spice    | Woody                                                             |                         |                   | 3.19E+06    |          |
| Methyl anthranilate            | 134-20-3  | 68 h      | 96     | 25.24    | 8: 93 80 92 151 65 120 98 95                                                | 86          | Honey, Flower         | Fruity                                                            | 1.15E-03                |                   | 8.93E+04    | 7.78E+07 |
| 2,4-di-tert-butylphenol        | 96-76-4   | 68 h      | 97     | 26.36    | 4: 191 200 116 206                                                          | 74          |                       | Phenolic                                                          |                         |                   | 7.61E+04    |          |

| Compound            | CAS        | Ext. Time | Peak # | RT (min) | Models                                                                                 | Net % Match | Published Descriptors |                                                    | Published ODT (ppm)     |                   | Surrogate Conc. (PAC) | OAV |
|---------------------|------------|-----------|--------|----------|----------------------------------------------------------------------------------------|-------------|-----------------------|----------------------------------------------------|-------------------------|-------------------|-----------------------|-----|
|                     |            |           |        |          |                                                                                        |             | Flavornet[1]          | TGSC[2]                                            | LRI & Odour Database[3] | Devos, et al. [4] |                       |     |
| $\alpha$ -bisabolol | 72691-24-8 | 68 h      | 98     | 26.42    | 20: 204 95 110<br>67 122 92 139 84<br>81 148 161 97<br>137 133 68 123<br>78 83 140 190 | 98          |                       |                                                    |                         |                   | 7.43E+06              |     |
| (-)-Globulol        | 489-41-8   | 68 h      | 99     | 27.32    | 18: 81 121 151<br>119 95 123 204<br>133 91 148 222<br>189 145 55 149<br>41 79 82       | 73          |                       |                                                    |                         |                   | 8.23E+05              |     |
| Diethyl Phthalate   | 84-66-2    | 68 h      | 100    | 27.43    | 7: 149 65 222 50<br>119 150 93                                                         | 93          |                       |                                                    |                         |                   | 4.00E+05              |     |
| Benzophenone        | 119-61-9   | 68 h      | 101    | 28.78    | 2: 105 93                                                                              | 80          |                       | Balsam, Rose,<br>Metallic,<br>Powdery,<br>Geranium |                         |                   | 9.39E+04              |     |

A total of 121 chemical peaks were tentatively identified by *multidimensional* GC-MS; [1] Acree TE, Arn H. Flavornet and human odor space [Internet]. Geneva, NY: Cornell University; [2004; cited 2014 August 08]. Available from: <http://flavornet.org/flavornet.html> [2] The Good Scents Company Information System [Internet]. Oak Creek, WI; [1994; cited 2014 August 08]. Available from: <http://www.thegoodscentscompany.com/index.html#> [3] Mottram R. LRI & Odour Database [Internet]. UK: University of Reading; [2006; cited 2014 August 08]. Available from: [www.odour.org.uk/index.html](http://www.odour.org.uk/index.html) [4] Devos M, Patte F, Rouault J, Laffort P, Van Gemert LJ, editors. Standardized Human Olfactory Thresholds. IRL Press at Oxford Press; 1990. Peak # refers to chronological order compounds eluted from the analytical GC column; RT refers to retention time in min; Quantifying Ions are the component ions (number of ions used to quantify :corresponding m/z in order of relative abundance) or total ion chromatogram (TIC) used in AMDIS target library search and signal integration; % Match is net percent probability match of unknown spectra to database spectra, calculated by AMDIS; Surrogate Conc. is MS response to each separated compound, in peak area counts (PAC) (i.e. the integrated area under the curve of each chromatographic peak); OAV is the calculated Odor Activity Value (ratio of surrogate concentration to odor detection threshold), assuming equal mass detector response to all compounds, and assuming PAC units of ppm for illustrative purposes. All ODTs presented in this table are human olfactory thresholds in air.
