# Supplementary material for: Characterizing the Smell of Marijuana by Odor Impact of Volatile Compounds: An Application of Simultaneous Chemical and Sensory Analysis
Source: PubMed Central journal article supplement (PMC4684335; doi:10.1371/journal.pone.0144160), 2015-12-10
Supplement: pone.0144160.s009.pdf [file pone.0144160.s009.pdf]

**Table S4. Summary of F-statistics and p-values from two-way analysis of variance comparing the effect of packaging on VOC emitted from marijuana at 5 min, 1 h, and 68 h extraction times.**

|                                                                            | R <sup>2</sup> | Packaging   |         | Ext. Time   |         |         |        |
|----------------------------------------------------------------------------|----------------|-------------|---------|-------------|---------|---------|--------|
|                                                                            |                | F-Statistic | p-value | F-Statistic | p-value |         |        |
| (-)-Globulol                                                               | 0.987          | 51.765      | 0.019   | 1.000       | 0.423   | 77.148  | 0.013† |
| (+)-4-Carene                                                               | 0.817          | 2.980       | 0.261   | 1.000       | 0.423   | 3.970   | 0.201  |
| (+)-calarene                                                               | 0.657          | 1.275       | 0.468   | 1.824       | 0.309   | 1.000   | 0.500  |
| (+)-nerolidol                                                              | 0.998          | 310.437     | 0.003   | 1.000       | 0.423   | 465.156 | 0.002† |
| (+)-sativene                                                               | 0.302          | 0.288       | 0.834   | 0.085       | 0.798   | 0.390   | 0.719  |
| 1-(3-methylphenyl)-ethanone                                                | 0.600          | 1.000       | 0.535   | 1.000       | 0.423   | 1.000   | 0.500  |
| 1,1-dimethyl-hydrazine                                                     | 0.423          | 0.489       | 0.725   | 0.012       | 0.922   | 0.728   | 0.579  |
| 1,3,5-triazine-2,4,6-triamine                                              | 0.914          | 7.097       | 0.126   | 1.000       | 0.423   | 10.145  | 0.090  |
| 1,3-dichlorobenzene                                                        | 0.957          | 14.855      | 0.064   | 1.000       | 0.423   | 21.782  | 0.044◇ |
| 1-butanol                                                                  | 0.979          | 30.556      | 0.032   | 1.000       | 0.423   | 45.335  | 0.022† |
| 1-butoxy-2-propanol                                                        | 0.600          | 1.000       | 0.535   | 1.000       | 0.423   | 1.000   | 0.500  |
| 1-hexanol                                                                  | 0.961          | 16.559      | 0.057   | 1.000       | 0.423   | 24.338  | 0.039† |
| 1-Propanamine, 3-dibenzo[b,e]thiepin-11(6H)-ylidene-N,N-dimethyl-, S-oxide | 0.600          | 1.000       | 0.535   | 1.000       | 0.423   | 1.000   | 0.500  |
| 2,3,4-trimethylpentane                                                     | 0.254          | 0.227       | 0.872   | 0.006       | 0.943   | 0.338   | 0.748  |
| 2,4-di-tert-butylphenol                                                    | 0.927          | 8.506       | 0.107   | 1.000       | 0.423   | 12.259  | 0.075  |
| 2,6-dimethylquinoline                                                      | 0.952          | 13.284      | 0.071   | 1.000       | 0.423   | 19.425  | 0.049◇ |
| 2-butoxyethanol                                                            | 0.834          | 3.353       | 0.238   | 1.000       | 0.423   | 4.529   | 0.181  |
| 2-chloroacetophenone                                                       | 0.712          | 1.646       | 0.400   | 3.183       | 0.216   | 0.878   | 0.533  |
| 2-ethenyl-1,3-dimethylbenzene                                              | 0.766          | 2.180       | 0.330   | 1.000       | 0.423   | 2.771   | 0.265  |
| 2-ethoxyethanol                                                            | 0.793          | 2.554       | 0.294   | 1.000       | 0.423   | 3.331   | 0.231  |
| 2-ethylhexanol                                                             | 0.962          | 16.695      | 0.057   | 2.675       | 0.244   | 23.706  | 0.040‡ |
| 2-heptanone                                                                | 0.998          | 295.779     | 0.003   | 1.000       | 0.423   | 443.169 | 0.002† |
| 2-isopropenyl-3-methylpyrazine                                             | 0.558          | 0.842       | 0.583   | 0.796       | 0.466   | 0.864   | 0.536  |
| 2-methyl naphthalene                                                       | 0.785          | 2.428       | 0.305   | 1.000       | 0.423   | 3.142   | 0.241  |
| 2-methyl-1H-imidazole                                                      | 0.965          | 18.596      | 0.051   | 1.000       | 0.423   | 27.395  | 0.035† |
| 2-methylaziridine                                                          | 0.303          | 0.289       | 0.833   | 0.155       | 0.732   | 0.357   | 0.737  |
| 2-methylpentane                                                            | 0.730          | 1.803       | 0.376   | 0.753       | 0.477   | 2.328   | 0.300  |
| 2-nitropropane                                                             | 0.715          | 1.676       | 0.395   | 3.028       | 0.224   | 1.000   | 0.500  |
| 2-phenoxyethanol                                                           | 0.692          | 1.497       | 0.424   | 1.000       | 0.423   | 1.746   | 0.364  |
| 3,4,5-trimethyl-1-hexene                                                   | 0.699          | 1.552       | 0.415   | 2.655       | 0.245   | 1.000   | 0.500  |
| 3-methylpentane                                                            | 0.712          | 1.652       | 0.399   | 0.985       | 0.426   | 1.986   | 0.335  |
| 3-pentanol                                                                 | 0.600          | 1.000       | 0.535   | 1.000       | 0.423   | 1.000   | 0.500  |
| 4-methyldecane                                                             | 0.678          | 1.406       | 0.441   | 2.219       | 0.275   | 1.000   | 0.500  |
| 4-methylpyrimidine                                                         | 0.877          | 4.774       | 0.178   | 1.000       | 0.423   | 6.660   | 0.131  |
| 4-pyridinamine                                                             | 0.974          | 25.105      | 0.039   | 1.000       | 0.423   | 37.157  | 0.026† |
| 5-methylindane                                                             | 0.600          | 1.000       | 0.535   | 1.000       | 0.423   | 1.000   | 0.500  |
| Acetaldehyde                                                               | 0.415          | 0.472       | 0.733   | 0.322       | 0.628   | 0.548   | 0.646  |
| Acetamide                                                                  | 0.694          | 1.509       | 0.422   | 1.000       | 0.423   | 1.764   | 0.362  |
| Acetic acid                                                                | 0.960          | 15.92       | 0.060   | 2.216       | 0.275   | 22.773  | 0.042‡ |
| Acetone                                                                    | 0.474          | 0.600       | 0.674   | 0.027       | 0.885   | 0.887   | 0.530  |
| Acetophenone                                                               | 0.845          | 3.629       | 0.224   | 1.000       | 0.423   | 4.943   | 0.168  |
| Aromadendrene                                                              | 0.904          | 6.245       | 0.141   | 0.953       | 0.432   | 8.891   | 0.101  |
| Benzaldehyde                                                               | 0.937          | 9.852       | 0.094   | 1.034       | 0.416   | 14.261  | 0.066  |
| Benzonitrile                                                               | 0.889          | 5.319       | 0.162   | 1.000       | 0.423   | 7.479   | 0.118  |
| Benzophenone                                                               | 0.994          | 103.841     | 0.010   | 1.000       | 0.423   | 155.261 | 0.006† |
| Benzyl acetate                                                             | 0.797          | 2.624       | 0.288   | 1.000       | 0.423   | 3.436   | 0.225  |

|                                | R <sup>2</sup> | F-Statistic | p-value | Packaging   |         | Ext. Time   |         |
|--------------------------------|----------------|-------------|---------|-------------|---------|-------------|---------|
|                                |                |             |         | F-Statistic | p-value | F-Statistic | p-value |
| Benzyl Alcohol                 | 0.977          | 28.582      | 0.034   | 0.235       | 0.676   | 42.755      | 0.023†  |
| Benzyl formate                 | 0.744          | 1.937       | 0.358   | 1.000       | 0.423   | 2.406       | 0.294   |
| Benzyl nitrile                 | 0.976          | 26.564      | 0.036   | 1.000       | 0.423   | 39.345      | 0.025†  |
| Betahistine                    | 0.600          | 1.000       | 0.535   | 1.000       | 0.423   | 1.000       | 0.500   |
| Butane                         | 0.376          | 0.401       | 0.770   | 0.230       | 0.679   | 0.487       | 0.673   |
| Butyl formate                  | 0.687          | 1.466       | 0.430   | 2.399       | 0.262   | 1.000       | 0.500   |
| Camphene                       | 0.988          | 55.008      | 0.018   | 2.939       | 0.229   | 81.043      | 0.012†  |
| Caryophyllene oxide            | 0.949          | 12.413      | 0.075   | 0.934       | 0.436   | 18.152      | 0.052   |
| cis-2-pinanol                  | 0.986          | 45.961      | 0.021   | 1.000       | 0.423   | 68.441      | 0.014†  |
| Citronellolformate             | 0.971          | 22.408      | 0.043   | 1.000       | 0.423   | 33.111      | 0.029†  |
| Decanal                        | 0.772          | 2.256       | 0.322   | 1.000       | 0.423   | 2.885       | 0.257   |
| Diacetone alcohol              | 0.730          | 1.804       | 0.376   | 3.413       | 0.206   | 1.000       | 0.500   |
| Diethyl Phthalate              | 0.764          | 2.161       | 0.332   | 1.000       | 0.423   | 2.742       | 0.267   |
| Dimethylbenzylcarbinyl acetate | 0.939          | 10.246      | 0.090   | 1.000       | 0.423   | 14.869      | 0.063   |
| Dimethylpyrazine               | 0.989          | 60.462      | 0.016   | 1.000       | 0.423   | 90.193      | 0.011†  |
| Dimethylsulfide                | 0.702          | 1.567       | 0.412   | 2.700       | 0.242   | 1.000       | 0.500   |
| Dimethylsulfone                | 0.631          | 1.140       | 0.499   | 1.421       | 0.356   | 1.000       | 0.500   |
| DL-carvone                     | 0.851          | 3.814       | 0.215   | 1.000       | 0.423   | 5.221       | 0.161   |
| Dodecane                       | 0.730          | 1.804       | 0.376   | 1.000       | 0.423   | 2.206       | 0.312   |
| Dyclocaïne                     | 0.731          | 1.813       | 0.375   | 3.439       | 0.205   | 1.000       | 0.500   |
| Ethanol                        | 0.571          | 0.889       | 0.568   | 0.052       | 0.841   | 1.308       | 0.433   |
| Ethylene oxide                 | 0.737          | 1.872       | 0.367   | 1.183       | 0.390   | 2.217       | 0.311   |
| Ethylenediamine                | 0.685          | 1.449       | 0.433   | 0.017       | 0.909   | 2.165       | 0.316   |
| Ethylenimine                   | 0.690          | 1.484       | 0.427   | 2.451       | 0.258   | 1.000       | 0.500   |
| Fenchyl alcohol                | 0.824          | 3.122       | 0.252   | 1.000       | 0.423   | 4.183       | 0.193   |
| Formic acid                    | 0.600          | 1.000       | 0.535   | 1.000       | 0.423   | 1.000       | 0.500   |
| Furfural                       | 0.996          | 163.606     | 0.006   | 1.000       | 0.423   | 244.909     | 0.004†  |
| Heptanal                       | 0.955          | 14.188      | 0.067   | 1.000       | 0.423   | 20.782      | 0.046◇  |
| Hexanal                        | 0.981          | 35.257      | 0.028   | 1.630       | 0.330   | 52.070      | 0.019†  |
| Hydrazine                      | 0.956          | 14.586      | 0.065   | 15.147      | 0.060   | 14.306      | 0.065   |
| Isoamyl alcohol                | 0.600          | 1.000       | 0.535   | 1.000       | 0.423   | 1.000       | 0.500   |
| Isobornyl thiocynoacetate      | 0.600          | 1.000       | 0.535   | 1.000       | 0.423   | 1.000       | 0.500   |
| Isobutane                      | 0.706          | 1.604       | 0.406   | 0.194       | 0.702   | 2.309       | 0.302   |
| Isobutyraldehyde               | 0.595          | 0.981       | 0.541   | 0.975       | 0.427   | 0.984       | 0.504   |
| Isocyanatomethane              | 0.750          | 1.998       | 0.351   | 3.994       | 0.184   | 1.000       | 0.500   |
| Isoprene                       | 0.789          | 2.499       | 0.299   | 2.204       | 0.276   | 2.647       | 0.274   |
| Limonene                       | 0.992          | 78.567      | 0.013   | 3.839       | 0.189   | 115.931     | 0.009†  |
| Linalool                       | 0.909          | 6.654       | 0.133   | 1.066       | 0.410   | 9.448       | 0.096   |
| m-cymene                       | 0.828          | 3.200       | 0.247   | 2.580       | 0.249   | 3.510       | 0.222   |
| Methacrolein                   | 0.954          | 13.700      | 0.069   | 0.024       | 0.892   | 20.537      | 0.046‡  |
| Methyl acetylsalicylate        | 0.781          | 2.382       | 0.309   | 1.000       | 0.423   | 3.072       | 0.246   |
| Methyl anthranilate            | 0.958          | 15.381      | 0.062   | 1.000       | 0.423   | 22.572      | 0.042◇  |
| Methyl benzoate                | 0.970          | 21.864      | 0.044   | 1.000       | 0.423   | 32.296      | 0.030†  |
| Methyl heptadienone            | 0.713          | 1.653       | 0.398   | 1.000       | 0.423   | 1.980       | 0.336   |
| Methyl mercaptan               | 0.946          | 11.730      | 0.080   | 1.000       | 0.423   | 17.095      | 0.055   |
| Methyl salicylate              | 0.992          | 81.765      | 0.012   | 1.000       | 0.423   | 122.148     | 0.008†  |
| Methylene chloride             | 0.856          | 3.959       | 0.208   | 4.542       | 0.167   | 3.668       | 0.214   |
| Methylisohexenyl ketone        | 0.986          | 48.075      | 0.020   | 1.466       | 0.350   | 71.380      | 0.014†  |
| m-tert-butylphenol             | 0.675          | 1.384       | 0.445   | 2.153       | 0.280   | 1.000       | 0.500   |
| Myrcene                        | 0.959          | 15.512      | 0.061   | 1.308       | 0.371   | 22.614      | 0.042‡  |
| Nerolidol                      | 0.991          | 74.032      | 0.013   | 1.000       | 0.423   | 110.548     | 0.009†  |
| Nonane                         | 0.647          | 1.222       | 0.480   | 1.000       | 0.423   | 1.332       | 0.429   |
| Octanal                        | 0.981          | 33.568      | 0.029   | 1.000       | 0.423   | 49.852      | 0.020†  |

|                     | R <sup>2</sup> |             |         | Packaging   |         | Ext. Time   |         |
|---------------------|----------------|-------------|---------|-------------|---------|-------------|---------|
|                     |                | F-Statistic | p-value | F-Statistic | p-value | F-Statistic | p-value |
| Pentanal            | 0.702          | 1.570       | 0.412   | 1.000       | 0.423   | 1.854       | 0.350   |
| Phenol              | 0.676          | 1.389       | 0.445   | 1.000       | 0.423   | 1.583       | 0.387   |
| Phenylethyl alcohol | 0.999          | 993.769     | 0.001   | 1.000       | 0.423   | 1490.154    | 0.001†  |
| Piperidine          | 0.600          | 1.000       | 0.535   | 1.000       | 0.423   | 1.000       | 0.500   |
| Propanal            | 0.871          | 4.514       | 0.187   | 3.290       | 0.211   | 5.126       | 0.163   |
| p-tert-butylphenol  | 0.600          | 1.000       | 0.535   | 1.000       | 0.423   | 1.000       | 0.500   |
| Sabinene            | 0.309          | 0.297       | 0.829   | 0.097       | 0.785   | 0.398       | 0.715   |
| Salicylaldehyde     | 0.902          | 6.126       | 0.144   | 1.000       | 0.423   | 8.689       | 0.103   |
| Styrene             | 0.870          | 4.465       | 0.188   | 1.000       | 0.423   | 6.197       | 0.139   |
| tert-butanol        | 0.672          | 1.367       | 0.449   | 1.082       | 0.408   | 1.510       | 0.398   |
| tert-butyl-benzene  | 0.998          | 280.293     | 0.004   | 1.000       | 0.423   | 419.939     | 0.002†  |
| Tridecane           | 0.759          | 2.102       | 0.338   | 1.000       | 0.423   | 2.653       | 0.274   |
| Tyramine            | 0.833          | 3.319       | 0.240   | 0.680       | 0.496   | 4.638       | 0.177   |
| Undecane            | 0.748          | 1.984       | 0.352   | 1.000       | 0.423   | 2.476       | 0.288   |
| Valencene           | 0.883          | 5.022       | 0.171   | 0.181       | 0.712   | 7.442       | 0.118   |
| Verbenone           | 0.668          | 1.341       | 0.454   | 2.092       | 0.285   | 0.966       | 0.509   |
| α-bisabolol         | 0.998          | 288.108     | 0.003   | 0.832       | 0.458   | 431.746     | 0.002†  |
| α-cedrene           | 0.564          | 0.862       | 0.576   | 0.827       | 0.459   | 0.880       | 0.532   |
| α-cubebene          | 0.952          | 13.256      | 0.071   | 1.000       | 0.423   | 19.384      | 0.049◇  |
| α-guaiene           | 0.939          | 10.314      | 0.090   | 3.260       | 0.213   | 13.841      | 0.067   |
| α-gurjunene         | 0.636          | 1.163       | 0.493   | 1.047       | 0.414   | 1.222       | 0.450   |
| α-humulene          | 0.813          | 2.896       | 0.267   | 0.037       | 0.865   | 4.326       | 0.188   |
| α-ionol             | 0.981          | 33.639      | 0.029   | 1.000       | 0.423   | 49.958      | 0.020†  |
| α-longipinene       | 0.984          | 40.155      | 0.024   | 1.000       | 0.423   | 59.733      | 0.016†  |
| α-phellandrene      | 0.535          | 0.767       | 0.609   | 0.564       | 0.531   | 0.869       | 0.535   |
| α-pinene            | 0.965          | 18.134      | 0.053   | 1.343       | 0.366   | 26.529      | 0.036‡  |
| α-terpinene         | 0.923          | 7.960       | 0.114   | 1.000       | 0.423   | 11.440      | 0.080   |
| α-terpineol         | 0.872          | 4.560       | 0.185   | 0.935       | 0.435   | 6.372       | 0.136   |
| β-caryophyllene     | 0.995          | 133.751     | 0.007   | 7.561       | 0.111   | 196.847     | 0.005†  |
| β-cedrene           | 0.992          | 84.259      | 0.012   | 1.000       | 0.423   | 125.888     | 0.008†  |
| β-pinene            | 1.000          | 2781.634    | 0.000   | 1.000       | 0.423   | 4171.951    | 0.000†  |
| β-selinene          | 0.971          | 22.028      | 0.044   | 0.041       | 0.858   | 33.021      | 0.029†  |
| γ-gurjunene         | 0.985          | 44.322      | 0.022   | 0.143       | 0.742   | 66.412      | 0.015†  |
| γ-terpinene         | 0.310          | 0.300       | 0.827   | 0.100       | 0.782   | 0.400       | 0.714   |
| δ-3-carene          | 0.995          | 144.384     | 0.007   | 1.000       | 0.423   | 216.076     | 0.005†  |

(†, 19 total) indicates significant difference in surrogate concentration of VOC at 68 h sampling time from the other two time points Tukey HSD. (‡, 5 total) indicates significant difference in surrogate concentration of the VOC between 5 min and 68 h only, (◇, 5 total) indicates no significance between extraction times after the pairwise comparison test. Statistical analysis software: XLStat V 2014.5.01 (New York, NY, USA)
