# Supplementary material for: Characterizing the Smell of Marijuana by Odor Impact of Volatile Compounds: An Application of Simultaneous Chemical and Sensory Analysis
Source: PubMed Central journal article supplement (PMC4684335; doi:10.1371/journal.pone.0144160), 2015-12-10
Supplement: pone.0144160.s010.pdf [file pone.0144160.s010.pdf]

**Table S5. Wilcoxon signed rank test of paired samples.**

| <b>Plastic Bag (5 min)</b> |        | <b>Loose (5 min)</b> |        |
|----------------------------|--------|----------------------|--------|
| V                          | 30     | V                    | 15     |
| Expected value             | 27.500 | Expected value       | 22.500 |
| Variance (V)               | 96.250 | Variance (V)         | 71.250 |
| p-value (Two-tailed)       | 0.838  | p-value (Two-tailed) | 0.407  |
| alpha                      | 0.05   | alpha                | 0.05   |

  

| <b>Plastic Bag (1 h)</b> |         | <b>Loose (1 h)</b>   |              |
|--------------------------|---------|----------------------|--------------|
| V                        | 22      | V                    | 71           |
| Expected value           | 52.500  | Expected value       | 162.500      |
| Variance (V)             | 253.750 | Variance (V)         | 1381.250     |
| p-value (Two-tailed)     | 0.060   | p-value (Two-tailed) | <u>0.014</u> |
| alpha                    | 0.05    | alpha                | 0.05         |

  

| <b>Plastic Bag (68 h)</b> |                    | <b>Loose (68 h)</b>  |                    |
|---------------------------|--------------------|----------------------|--------------------|
| V                         | 245                | V                    | 143                |
| Expected value            | 663.000            | Expected value       | 540.500            |
| Variance (V)              | 11381.500          | Variance (V)         | 8377.750           |
| p-value (Two-tailed)      | <u>&lt; 0.0001</u> | p-value (Two-tailed) | <u>&lt; 0.0001</u> |
| alpha                     | 0.05               | alpha                | 0.05               |

The hypothesized difference between volatile compound abundance and odor activity value was assumed to be zero, with a 5% significance level. Test interpretation:  $H_0$ : The two samples follow the same distribution.  $H_a$ : The distributions of the two samples are different. If the computed p-value is lower than the significance level  $\alpha=0.05$ , one should reject the null hypothesis  $H_0$ , and accept the alternative hypothesis  $H_a$ . Statistical analysis software: XLStat V 2014.5.01 (New York, NY, USA)
