# Supplementary material for: Characterizing the Smell of Marijuana by Odor Impact of Volatile Compounds: An Application of Simultaneous Chemical and Sensory Analysis
Source: PubMed Central journal article supplement (PMC4684335; doi:10.1371/journal.pone.0144160), 2015-12-10
Supplement: pone.0144160.s011.pdf [file pone.0144160.s011.pdf]

**Table S6. Hierarchy of volatile compounds with published ODT, emitted from marijuana, through packaging over 68 h.**

| Compound             | Plastic Bag<br>5 min |     | Plastic Bag<br>1 h |     | Plastic Bag<br>68 h |     | Loose<br>5 min |     | Loose<br>1 h |     | Loose<br>68 h |     | Duffel Bag<br>68 h |     |
|----------------------|----------------------|-----|--------------------|-----|---------------------|-----|----------------|-----|--------------|-----|---------------|-----|--------------------|-----|
|                      | [Conc]               | OAV | [Conc]             | OAV | [Conc]              | OAV | [Conc]         | OAV | [Conc]       | OAV | [Conc]        | OAV | [Conc]             | OAV |
| Hydrazine            | 1                    | 1   |                    |     | 1                   | 3   | 1              | 1   | 1            | 1   | 2             | 2   | 3                  | 1   |
| Salicyladehyde       |                      |     |                    |     | 2                   | 28  |                |     |              |     | 3             | 28  | 23                 | 39  |
| Acetaldehyde         |                      |     |                    |     | 3                   | 10  |                |     | 2            | 5   |               |     |                    |     |
| Methyl benzoate      |                      |     |                    |     | 4                   | 15  |                |     |              |     | 4             | 17  | 40                 | 32  |
| Propanal             |                      |     |                    |     | 5                   | 26  |                |     | 5            | 16  | 8             | 23  |                    |     |
| 2-ethoxyethanol      |                      |     |                    |     | 6                   | 7   |                |     |              |     | 13            | 8   |                    |     |
| Phenylethyl alcohol  |                      |     |                    |     | 7                   | 30  |                |     |              |     | 9             | 26  | 27                 | 35  |
| 2-butoxyethanol      |                      |     |                    |     | 8                   | 11  |                |     |              |     | 19            | 19  |                    |     |
| Acetamide            |                      |     |                    |     | 9                   | 1   |                |     |              |     | 28            | 3   |                    |     |
| 1-butanol            |                      |     |                    |     | 10                  | 9   |                |     |              |     | 6             | 7   | 4                  | 5   |
| Styrene              |                      |     |                    |     | 11                  | 19  |                |     |              |     | 17            | 20  |                    |     |
| Methyl anthranilate  |                      |     |                    |     | 12                  | 45  |                |     |              |     | 11            | 40  | 13                 | 47  |
| DL-carvone           |                      |     |                    |     | 13                  | 31  |                |     |              |     | 21            | 31  |                    |     |
| Pentanal             |                      |     |                    |     | 14                  | 37  |                |     |              |     | 1             | 21  |                    |     |
| Methylene chloride   | 5                    | 2   | 5                  | 2   | 15                  | 4   |                |     | 9            | 2   |               |     |                    |     |
| Benzyl acetate       |                      |     |                    |     | 16                  | 23  |                |     |              |     | 26            | 24  |                    |     |
| $\alpha$ -pinene     | 6                    | 8   | 8                  | 5   | 17                  | 13  | 3              | 4   | 17           | 14  | 23            | 16  | 49                 | 25  |
| Methyl salicylate    |                      |     |                    |     | 18                  | 32  |                |     |              |     | 15            | 25  | 14                 | 23  |
| 1-hexanol            |                      |     |                    |     | 19                  | 33  |                |     |              |     | 24            | 29  | 12                 | 22  |
| Isoamyl alcohol      |                      |     |                    |     | 20                  | 35  |                |     |              |     |               |     |                    |     |
| Octanal              |                      |     |                    |     | 21                  | 47  |                |     |              |     | 14            | 41  |                    |     |
| Furfural             |                      |     |                    |     | 22                  | 14  |                |     |              |     | 22            | 13  |                    |     |
| Piperidine           |                      |     |                    |     | 23                  | 21  |                |     |              |     |               |     | 28                 | 17  |
| Acetophenone         |                      |     |                    |     | 24                  | 24  |                |     |              |     | 10            | 14  | 17                 | 14  |
| 2-heptanone          |                      |     |                    |     | 25                  | 27  |                |     |              |     | 25            | 22  | 19                 | 18  |
| Phenol               |                      |     |                    |     | 26                  | 29  |                |     |              |     | 39            | 33  | 24                 | 21  |
| 2-chloroacetophenone | 2                    | 9   | 11                 | 13  | 27                  | 39  | 2              | 7   |              |     |               |     | 51                 | 52  |
| $\alpha$ -terpineol  |                      |     | 2                  | 9   | 28                  | 38  |                |     | 4            | 13  | 31            | 34  | 48                 | 42  |



| Compound                   | Plastic Bag<br>5 min |     | Plastic Bag<br>1 h |     | Plastic Bag<br>68 h |     | Loose<br>5 min |     | Loose<br>1 h |     | Loose<br>68 h |     | Duffel Bag<br>68 h |     |
|----------------------------|----------------------|-----|--------------------|-----|---------------------|-----|----------------|-----|--------------|-----|---------------|-----|--------------------|-----|
|                            | [Conc]               | OAV | [Conc]             | OAV | [Conc]              | OAV | [Conc]         | OAV | [Conc]       | OAV | [Conc]        | OAV | [Conc]             | OAV |
| p-xylene                   |                      |     |                    |     |                     |     |                |     |              |     |               |     | 10                 | 10  |
| o-guaiacol                 |                      |     |                    |     |                     |     |                |     |              |     |               |     | 11                 | 49  |
| o-methylacetophenone       |                      |     |                    |     |                     |     |                |     |              |     |               |     | 15                 | 38  |
| Eugenol                    |                      |     |                    |     |                     |     |                |     |              |     |               |     | 16                 | 34  |
| Cumene                     |                      |     |                    |     |                     |     |                |     |              |     |               |     | 18                 | 28  |
| p-cymene                   |                      |     |                    |     |                     |     |                |     |              |     |               |     | 20                 | 44  |
| 1,2,3,4-tetramethylbenzene |                      |     |                    |     |                     |     |                |     |              |     |               |     | 21                 | 30  |
| p-methylacetophenone       |                      |     |                    |     |                     |     |                |     |              |     |               |     | 22                 | 40  |
| o-xylene                   |                      |     |                    |     |                     |     |                |     |              |     |               |     | 25                 | 12  |
| Durene                     |                      |     |                    |     |                     |     |                |     |              |     |               |     | 26                 | 31  |
| Methyl heptanoate          |                      |     |                    |     |                     |     |                |     |              |     |               |     | 29                 | 26  |
| o-cymene                   |                      |     |                    |     |                     |     |                |     |              |     |               |     | 30                 | 54  |
| Anethole                   |                      |     |                    |     |                     |     |                |     |              |     |               |     | 31                 | 43  |
| Nitrobenzene               |                      |     |                    |     |                     |     |                |     |              |     |               |     | 32                 | 33  |
| Toluene                    |                      |     |                    |     |                     |     |                |     |              |     |               |     | 33                 | 13  |
| Ethylacetate               |                      |     |                    |     |                     |     |                |     |              |     |               |     | 34                 | 11  |
| 2-butanone                 |                      |     |                    |     |                     |     |                |     |              |     |               |     | 35                 | 8   |
| Linalyl acetate            |                      |     |                    |     |                     |     |                |     |              |     |               |     | 38                 | 48  |
| 1-undecanol                |                      |     |                    |     |                     |     |                |     |              |     |               |     | 41                 | 36  |
| 3-pentanol                 |                      |     |                    |     |                     |     |                |     | 11           | 8   |               |     | 44                 | 24  |
| Propylamine                |                      |     |                    |     |                     |     |                |     |              |     |               |     | 45                 | 50  |
| Nonanal                    |                      |     |                    |     |                     |     |                |     |              |     |               |     | 50                 | 56  |
| Isobutyraldehyde           | 10                   | 10  |                    |     |                     |     |                |     | 3            | 11  |               |     | 55                 | 53  |
| 2-nitropropane             | 3                    | 4   | 1                  | 1   |                     |     |                |     |              |     |               |     |                    |     |
| (+)-4-Carene               |                      |     | 3                  | 3   |                     |     |                |     | 13           | 6   |               |     |                    |     |

Numbers in the table are the assigned ranking of the compound in terms of surrogate concentration ([Conc], as expressed by MS response in peak area counts) or odor impact (OAV) as calculated by Eq. 1. A rank of 1 indicates low surrogate concentration (e.g., Hydrazine from 5 min, plastic bag) or low odor impact (e.g., 2-nitropropane from 1 h, plastic bag). A rank of 56 indicates high surrogate concentration (e.g., Limonene from 68 h, duffel bag) or high odor impact (e.g., Nonanal from 68 h, duffel bag).
