# Supplementary material for: Characterizing the Smell of Marijuana by Odor Impact of Volatile Compounds: An Application of Simultaneous Chemical and Sensory Analysis
Source: PubMed Central journal article supplement (PMC4684335; doi:10.1371/journal.pone.0144160), 2015-12-10
Supplement: pone.0144160.s013.pdf [file pone.0144160.s013.pdf]

**Table S8. Identification of VOC emitted though cloth duffel bag in headspace of marijuana sample, and captured by SPME over 68 h.**

| Compound # | Aromagram # | ABC box | TIC RT (min) | AG RT (min) | Published ODT (ppm)      |            | Published Descriptors    |                   |                 |                            |                                       |                       |          |
|------------|-------------|---------|--------------|-------------|--------------------------|------------|--------------------------|-------------------|-----------------|----------------------------|---------------------------------------|-----------------------|----------|
|            |             |         |              |             | Compound                 | CAS        | LRI & Odour Database [1] | Devos, et al. [2] | Odor Descriptor | Flavornet [3]              | TGSC [4]                              | Surrogate Conc. (PAC) | OAV      |
| 1          | B           |         | 1.14         |             | Butyl formate            | 592-84-7   |                          |                   |                 |                            | Fruity                                | 4.89E+04              |          |
| 2          | B           |         | 1.24         |             | Isobutane                | 75-28-5    |                          | 1.00E+01          |                 |                            |                                       | 6.00E+06              | 6.00E+05 |
| 3          | B           |         | 1.24#        |             | Isobutyraldehyde         | 78-84-2    |                          | 4.07E-02          |                 | Pungent, Malt, Spicy Green |                                       | 6.00E+06              | 1.47E+08 |
| 4          | B           |         | 1.40         |             | 2-methylpentane          | 107-83-5   |                          |                   |                 |                            |                                       | 3.95E+05              |          |
| 5          | B           |         | 1.40         |             | 4-methyldecane           | 2847-72-5  |                          |                   |                 |                            |                                       | 3.21E+05              |          |
| 6          | B           |         | 1.40         |             | 3,4,5-trimethyl-1-hexene | 56728-10-0 |                          |                   |                 |                            |                                       | 3.21E+05              |          |
| 7          | B           |         | 1.45         |             | 2,2,5-trimethylhexane    | 3522-94-9  |                          |                   |                 |                            |                                       | 5.69E+04              |          |
| 8          | B           |         | 1.45         |             | Isocyanatomethane        | 624-83-9   |                          |                   |                 |                            |                                       | 4.54E+04              |          |
| 9          | B           |         | 1.46         |             | 3-methylpentane          | 96-14-0    |                          |                   |                 |                            |                                       | 3.95E+04              |          |
| 10         | B           |         | 1.46         |             | 2-methylaziridine        | 75-55-8    |                          |                   |                 |                            |                                       | 8.10E+04              |          |
| 11         | B           |         | 1.66#        |             | Butane                   | 106-97-8   |                          | 2.04E+02          |                 |                            |                                       | 1.28E+06              | 6.28E+03 |
| 12         | B           |         | 1.66#        |             | Acetone                  | 67-64-1    |                          | 1.45E+01          |                 |                            | Solvent                               | 1.28E+06              | 8.87E+04 |
| 13         | B           |         | 1.77#        |             | Methyl acetate           | 79-20-9    |                          |                   |                 |                            | Ethereal                              | 2.50E+05              |          |
|            | 1           | C       |              | 1.92        |                          |            |                          |                   |                 | Plastic, Solvent           |                                       |                       |          |
| 14         | B           |         | 2.33         |             | Propylene glycol         | 57-55-6    |                          |                   |                 |                            |                                       | 7.44E+05              |          |
| 15         | B           |         | 2.33#        |             | Ethylacetate             | 141-78-6   |                          | 2.63E+00          |                 | Pineapple                  | Ethereal, Fruity, Sweet, Weedy, Green | 5.55E+05              | 2.11E+05 |
| 16         | B           |         | 2.34#        |             | Ethanol                  | 64-17-5    |                          | 2.88E+01          |                 | Sweet                      | Alcoholic                             | 1.08E+06              | 3.74E+04 |
| 17         | B           |         | 2.34         |             | methylhydrazine          | 60-34-4    |                          |                   |                 |                            |                                       | 7.32E+05              |          |
| 18         | B           |         | 2.34#        |             | Formic acid              | 64-18-6    |                          | 2.82E+01          |                 |                            | Acetic                                | 7.13E+05              | 2.53E+04 |
|            | 2           | C       |              | 3.09        |                          |            |                          |                   |                 | Onion, Garlic              |                                       |                       |          |
|            | 3           | C       |              | 3.31        |                          |            |                          |                   |                 | Moldy                      |                                       |                       |          |

| Compound # | Aromagram # | ABC box | TIC RT (min) | AG RT (min) | Compound                     | CAS       | Published ODT (ppm)      |                   | Published Descriptors                 |                           |            |                       |          |          |
|------------|-------------|---------|--------------|-------------|------------------------------|-----------|--------------------------|-------------------|---------------------------------------|---------------------------|------------|-----------------------|----------|----------|
|            |             |         |              |             |                              |           | LRI & Odour Database [1] | Devos, et al. [2] | Odor Descriptor                       | Flavornet [3]             | TGSC [4]   | Surrogate Conc. (PAC) | OAV      |          |
| 19         | B           |         | 3.42         |             | 3-methyl-2-cyclopenten-1-one | 2758-18-1 |                          |                   |                                       |                           | Fruity     |                       | 5.29E+04 |          |
| 20         | B           |         | 3.92         |             | Hydrazine                    | 302-01-2  |                          | 3.00E+00          |                                       |                           |            |                       | 1.60E+04 | 5.34E+03 |
| 21         | B           |         | 3.93         |             | Propylamine                  | 107-10-8  |                          | 1.10E-02          |                                       |                           | Ammoniacal |                       | 1.18E+06 | 1.08E+08 |
| 22         | B           |         | 3.93         |             | 3-pentanol                   | 584-02-1  |                          | 4.68E-01          |                                       | Fruit                     | Herbal     |                       | 1.18E+06 | 2.53E+06 |
| 23         | B           |         | 3.93#        |             | 1,1-dimethylhydrazine        | 57-14-7   |                          |                   |                                       |                           |            |                       | 4.11E+05 |          |
| 24         | 4           | A       | 3.93         | 3.96        | Ethylenediamine              | 107-15-3  |                          |                   |                                       | Sweet, Solvent            |            |                       | 3.89E+05 |          |
| 25         | B           |         | 5.05#        |             | Toluene                      | 108-88-3  |                          | 1.55E+00          |                                       | Paint                     | Sweet      |                       | 4.51E+05 | 2.91E+05 |
| 26         | B           |         | 5.06#        |             | Phenylethyl alcohol          | 60-12-8   |                          | 1.70E-02          |                                       | Honey, Spice, Rose, Lilac | Floral     |                       | 2.24E+05 | 1.32E+07 |
|            | 5           | C       |              | 5.32        |                              |           |                          |                   |                                       | Cardboard                 |            |                       |          |          |
|            | 6           | C       |              | 5.50        |                              |           |                          |                   |                                       | Sweet, Fruity             |            |                       |          |          |
| 27         | 7           | A       | 5.99#        | 6.00        | Hexanal                      | 66-25-1   | 4.00E-03                 | 1.38E-02          | Grassy, Aldehydic                     | Grass, Tallow, Fat        | Green      |                       | 2.18E+04 | 1.58E+06 |
|            | 8           | C       |              | 6.46        |                              |           |                          |                   | Sweet, Fruity                         |                           |            |                       |          |          |
|            | 9           | C       |              | 6.59        |                              |           |                          |                   | Onion, Skunky                         |                           |            |                       |          |          |
|            | 10          | C       |              | 6.92        |                              |           |                          |                   | Resiny, Characteristic, Onion, Skunky |                           |            |                       |          |          |
|            | 11          | C       |              | 7.74        |                              |           |                          |                   | Smoky, Resiny, Potato                 |                           |            |                       |          |          |
|            | 12          | C       |              | 8.36        |                              |           |                          |                   | Resiny, Potato, Characteristic        |                           |            |                       |          |          |

| Compound # | Aromagram # | ABC box | TIC RT (min) | AG RT (min) | Compound                    | CAS        | Published ODT (ppm)      |                   | Published Descriptors                   |                         |                |                       |          |          |
|------------|-------------|---------|--------------|-------------|-----------------------------|------------|--------------------------|-------------------|-----------------------------------------|-------------------------|----------------|-----------------------|----------|----------|
|            |             |         |              |             |                             |            | LRI & Odour Database [1] | Devos, et al. [2] | Odor Descriptor                         | Flavornet [3]           | TGSC [4]       | Surrogate Conc. (PAC) | OAV      |          |
| 28         | B           |         | 8.42         |             | 2-methyl-2-propanamine      | 75-64-9    |                          |                   |                                         |                         | 0              |                       | 1.64E+05 |          |
| 29         | B           |         | 8.42         |             | Hordenine                   | 539-15-1   |                          |                   |                                         |                         | 0              |                       | 1.50E+05 |          |
| 30         | B           |         | 8.42#        |             | 2-heptanone                 | 110-43-0   | 1.40E-01                 | 1.41E-01          | Soap                                    |                         | Cheesy         |                       | 1.29E+05 | 9.14E+05 |
| 31         | B           |         | 8.98         |             | Hexanoic acid, methyl ester | 106-70-7   |                          |                   | Fruit, Fresh, Sweet                     |                         | Fruity         |                       | 3.10E+05 |          |
| 32         | B           |         | 9.27         |             | Sabinene                    | 3387-41-5  |                          |                   | Pepper, Turpentine, Wood                |                         | Woody          |                       | 3.89E+04 |          |
|            | 13          | C       |              | 9.36        |                             |            |                          |                   | Medicinal, Herbaceous                   |                         |                |                       |          |          |
|            | 14          | C       |              | 9.64        |                             |            |                          |                   | Herbaceous, Medicinal                   |                         |                |                       |          |          |
| 33         | 15          | B       | 10.02        | 9.93        | $\beta$ -pinene             | 18172-67-3 |                          |                   | Aldehydic, Citrus, Mint, Characteristic | Pine, Resin, Turpentine | Terpenic       |                       | 1.65E+08 |          |
| 34         | 16          | A       | 10.46        | 10.48       | Isoprene                    | 78-79-5    |                          |                   | Moldy                                   |                         |                |                       | 2.38E+05 |          |
| 35         | B           |         | 10.53        |             | Furfurylmethylamphetamine   | 13445-60-8 |                          |                   |                                         |                         |                |                       | 6.46E+05 |          |
|            | 17          | C       |              | 10.64       |                             |            |                          |                   | Onion, Garlic, Skunky, Medicinal        |                         |                |                       |          |          |
| 36         | B           |         | 10.73#       |             | 1-butanol                   | 71-36-3    |                          | 4.90E-01          |                                         | Medicine, Fruit         | Fermented      |                       | 1.82E+04 | 3.71E+04 |
| 37         | B           |         | 10.73#       |             | 1-hexanol                   | 111-27-3   |                          | 4.37E-02          |                                         | Resin, Flower, Green    | Herbal         |                       | 9.81E+04 | 2.25E+06 |
| 38         | B           |         | 10.75#       |             | Acrolein                    | 107-02-8   |                          | 1.74E-01          |                                         |                         | Almond, Cherry |                       | 8.29E+03 | 4.77E+04 |
| 39         | B           |         | 10.90#       |             | Limonene                    | 138-86-3   | 1.00E-02                 | 4.37E-01          |                                         | Lemon, Orange           | Citrus         |                       | 3.48E+07 | 7.97E+07 |
| 40         | 18          | A       | 10.90#       | 10.98       | Camphene                    | 79-92-5    |                          |                   | Mushroom, Moldy                         | Camphor                 | Woody          |                       | 3.48E+07 |          |

| Compound # | Aromagram # | ABC box | TIC RT (min) | AG RT (min) | Compound                   | CAS        | Published ODT (ppm)      |                   | Published Descriptors          |                         |                           |                       |          |
|------------|-------------|---------|--------------|-------------|----------------------------|------------|--------------------------|-------------------|--------------------------------|-------------------------|---------------------------|-----------------------|----------|
|            |             |         |              |             |                            |            | LRI & Odour Database [1] | Devos, et al. [2] | Odor Descriptor                | Flavornet [3]           | TGSC [4]                  | Surrogate Conc. (PAC) | OAV      |
| 41         | B           |         | 11.28        |             | (1R)-(+)-trans-isolimonene | 5113-87-1  |                          |                   |                                |                         |                           | 9.34E+05              |          |
| 42         | B           |         | 11.37        |             | m-cymene                   | 535-77-3   |                          |                   |                                |                         |                           | 1.31E+05              |          |
| 43         | B           |         | 11.37#       |             | p-cymene                   | 99-87-6    |                          | 2.14E-03          | Solvent, Gasoline, Citrus      | Terpenic                |                           | 1.31E+05              | 6.12E+07 |
| 44         | B           |         | 11.41        |             | 5-ethenyl-2-methylpyridine | 140-76-1   |                          |                   |                                |                         |                           | 3.21E+04              |          |
| 45         | B           |         | 11.48        |             | Methyl valerate            | 624-24-8   |                          |                   |                                | Fruity                  |                           | 2.95E+05              |          |
| 46         | B           |         | 11.48        |             | Methyl heptanoate          | 106-73-0   |                          | 6.92E-02          |                                | Fruity                  |                           | 2.48E+05              | 3.59E+06 |
| 47         | B           |         | 11.52        |             | 1,2,3,4-tetramethylbenzene | 488-23-3   |                          | 2.63E-02          |                                |                         |                           | 1.41E+05              | 5.36E+06 |
| 48         | 19          | A       | 11.54        | 11.55       | $\alpha$ -phellandrene     | 99-83-2    |                          |                   | Cardboard, Cabbage             | Turpentine, Mint, Spice | Terpenic                  | 8.89E+04              |          |
| 49         | B           |         | 11.56#       |             | $\delta$ -3-carene         | 13466-78-9 | 4.00E+00                 |                   |                                | Lemon, Resin            | Citrus                    | 2.07E+06              |          |
| 50         | B           |         | 11.57        |             | $\alpha$ -pinene           | 80-56-8    |                          | 6.92E-01          |                                | Pine, Turpentine        | Herbal                    | 2.20E+06              | 3.17E+06 |
|            | 20          | C       |              | 11.91       |                            |            |                          |                   | Onion, Garlic, Skunky, Sulfury |                         |                           |                       |          |
| 51         | 21          | A       | 12.23#       | 12.23       | Acetic acid                | 64-19-7    |                          | 1.45E-01          | Acidic, Burnt, Fatty acid      | Sour                    | Acidic                    | 4.18E+06              | 2.89E+07 |
| 52         | B           |         | 12.51        |             | (+)-4-Carene               | 29050-33-7 | 4.00E+00                 |                   |                                |                         |                           | 5.94E+05              |          |
| 53         | B           |         | 12.51        |             | $\gamma$ -terpinene        | 99-85-4    |                          |                   |                                | Gasoline, Turpentine    | Terpenic                  | 5.68E+05              |          |
| 54         | B           |         | 12.82#       |             | 2-butanone                 | 78-93-3    |                          | 7.76E+00          |                                | Ether                   | Ethereal, Fruity, Camphor | 6.62E+05              | 8.52E+04 |
| 55         | B           |         | 13.04        |             | 4-methylphenethylamine     | 3261-62-9  |                          |                   |                                |                         |                           | 2.00E+05              |          |

| Compound # | Aromagram # | ABC box | TIC RT (min) | AG RT (min) | Compound                                 | CAS       | Published ODT (ppm)      |                   | Published Descriptors          |                     |           |                       |          |
|------------|-------------|---------|--------------|-------------|------------------------------------------|-----------|--------------------------|-------------------|--------------------------------|---------------------|-----------|-----------------------|----------|
|            |             |         |              |             |                                          |           | LRI & Odour Database [1] | Devos, et al. [2] | Odor Descriptor                | Flavornet [3]       | TGSC [4]  | Surrogate Conc. (PAC) | OAV      |
| 56         | 22          | A       | 13.04        | 13.04       | o-methylacetophenone                     | 577-16-2  |                          | 6.61E-03          | Moldy, Burnt                   |                     | Floral    | 1.16E+05              | 1.76E+07 |
| 57         |             | B       | 13.05        |             | p-methylacetophenone                     | 122-00-9  |                          | 6.61E-03          |                                | Bitter, Almond      | Floral    | 1.69E+05              | 2.56E+07 |
| 58         |             | B       | 13.06#       |             | o-xylene                                 | 95-47-6   |                          | 8.51E-01          |                                | Geranium            | Geranium  | 1.98E+05              | 2.33E+05 |
| 59         |             | B       | 13.06#       |             | p-xylene                                 | 106-42-3  |                          | 4.90E-01          |                                |                     |           | 6.32E+04              | 1.29E+05 |
|            | 23          | C       |              | 13.37       |                                          |           |                          |                   | Moldy, Burnt, Burnt food       |                     |           |                       |          |
| 60         | 24          | A       | 13.59#       | 13.63       | Nonanal                                  | 124-19-6  | 1.00E-03                 | 2.24E-03          | Potato, Resiny, Roasted        | Fat, Citrus, Green  | Aldehydic | 2.37E+06              | 1.06E+09 |
| 61         |             | B       | 13.81        |             | 3,4,5-trimethylphenol                    | 527-54-8  |                          |                   |                                |                     | Phenolic  | 7.55E+05              |          |
| 62         | 25          | A       | 13.82        | 13.86       | 2-hydroxyacetophenone                    | 118-93-4  |                          |                   | Roasted, Potato, Resiny, Moldy |                     | Phenolic  | 7.57E+04              |          |
| 63         |             | B       | 13.87        |             | Isoquinoline                             | 119-65-3  |                          |                   |                                |                     | Balsamic  | 2.30E+04              |          |
| 64         |             | B       | 13.89        |             | 2-ethenyl-1,3-dimethylbenzene            | 2039-90-9 |                          |                   |                                |                     |           | 1.22E+06              |          |
| 65         |             | B       | 13.89        |             | 5-methylindane                           | 874-35-1  |                          |                   |                                |                     |           | 1.22E+06              |          |
| 66         |             | B       | 14.04#       |             | Benzaldehyde                             | 100-52-7  | 3.00E-03                 | 4.17E-02          |                                | Almond, Burnt sugar | Fruity    | 3.50E+06              | 8.40E+07 |
| 67         |             | B       | 14.05        |             | 2-chloroacetophenone                     | 532-27-4  |                          | 2.57E-02          |                                |                     |           | 3.08E+06              | 1.20E+08 |
|            | 26          | C       |              | 14.15       |                                          |           |                          |                   | Burnt, Burnt food              |                     |           |                       |          |
| 68         |             | B       | 14.17#       |             | Dodecane                                 | 112-40-3  |                          | 2.04E+00          |                                | Alkane              | Alkane    | 1.14E+06              | 5.58E+05 |
| 69         |             | B       | 14.19#       |             | $\alpha$ -terpinene                      | 99-86-5   |                          |                   |                                | Lemon               | Woody     | 1.43E+06              |          |
| 70         |             | B       | 14.19        |             | 3-(1-methylethyl)-phenol methylcarbamate | 64-00-6   |                          |                   |                                |                     |           | 5.04E+05              |          |

| Compound # | Aromagram # | ABC box | TIC RT (min) | AG RT (min) | Compound                | CAS       | Published ODT (ppm)      |                   | Published Descriptors |                                                  |           |                       |          |          |
|------------|-------------|---------|--------------|-------------|-------------------------|-----------|--------------------------|-------------------|-----------------------|--------------------------------------------------|-----------|-----------------------|----------|----------|
|            |             |         |              |             |                         |           | LRI & Odour Database [1] | Devos, et al. [2] | Odor Descriptor       | Flavornet [3]                                    | TGSC [4]  | Surrogate Conc. (PAC) | OAV      |          |
| 71         | B           |         | 14.21        |             | 2,4,6-trimethylphenol   | 527-60-6  |                          |                   |                       |                                                  | Phenolic  |                       | 1.08E+06 |          |
| 72         | B           |         | 14.21#       |             | Terpinolene             | 586-62-9  | 2.00E-01                 |                   |                       | Pine, Plastic                                    | Herbal    |                       | 6.14E+05 |          |
| 73         | B           |         | 14.22        |             | tert-butyl-benzene      | 98-06-6   |                          |                   |                       |                                                  |           |                       | 2.17E+05 |          |
| 74         | B           |         | 14.23        |             | o-cymene                | 527-84-4  |                          | 7.94E-04          |                       |                                                  |           |                       | 2.54E+05 | 3.20E+08 |
| 75         | B           |         | 14.23#       |             | Durene                  | 95-93-2   |                          | 2.63E-02          |                       | Rancid, Sweet                                    | Rancid    |                       | 1.99E+05 | 7.58E+06 |
| 76         | B           |         | 14.23        |             | Isodurene               | 527-53-7  |                          |                   |                       |                                                  |           |                       | 1.85E+05 |          |
| 77         | B           |         | 14.44        |             | 1,2-diethylbenzene      | 135-01-3  |                          |                   |                       |                                                  |           |                       | 6.97E+05 |          |
| 78         | B           |         | 14.45        |             | 1,4-diethylbenzene      | 105-05-5  |                          |                   |                       |                                                  |           |                       | 7.80E+05 |          |
| 79         | B           |         | 14.46        |             | 3-ethyl-o-xylene        | 933-98-2  |                          |                   |                       |                                                  |           |                       | 6.77E+05 |          |
|            | 27          | C       |              | 14.78       |                         |           |                          |                   |                       | Mushroom, Moldy                                  |           |                       |          |          |
| 80         | B           |         | 15.11        |             | Linalyl acetate         | 115-95-7  |                          | 8.91E-03          |                       | Sweet, Fruit                                     | Herbal    |                       | 8.58E+05 | 9.62E+07 |
| 81         | B           |         | 15.12        |             | Linalool                | 78-70-6   | 6.00E-03                 | 5.37E-02          |                       | Flower, Lavender                                 | Floral    |                       | 8.34E+05 | 1.55E+07 |
|            | 28          | C       |              | 15.28       |                         |           |                          |                   |                       | Moldy, Burnt, Burnt food, Fatty acid             |           |                       |          |          |
| 82         | B           |         | 15.39        |             | Nerolidol               | 7212-44-4 |                          |                   |                       | Wood, Flower, Wax                                | Floral    |                       | 4.33E+04 |          |
| 83         | B           |         | 15.40        |             | Limonene dioxide        | 96-08-2   |                          |                   |                       |                                                  | Mentholic |                       | 4.22E+04 |          |
| 84         | B           |         | 15.41        |             | Methacrylic anhydride   | 760-93-0  |                          |                   |                       |                                                  |           |                       | 2.27E+04 |          |
| 85         | B           |         | 15.41        |             | Nerol                   | 106-25-2  |                          | 2.04E-04          |                       | Sweet                                            | Floral    |                       | 2.41E+04 | 1.18E+08 |
| 86         | B           |         | 15.63#       |             | o-dimethyl hydroquinone | 91-16-7   |                          |                   |                       |                                                  | Vanilla   |                       | 2.28E+05 |          |
| 87         | 29          | A       | 15.64        | 15.68       | 4-methyl guaiacol       | 93-51-6   |                          |                   |                       | Herbaceous, Spicy, Burnt food, Fatty Acid, Burnt |           | Spicy                 | 8.92E+04 |          |
| 88         | B           |         | 15.85        |             | 1-undecanol             | 112-42-5  |                          | 6.76E-02          |                       | Mandarin                                         | Waxy      |                       | 9.21E+05 | 1.36E+07 |

| Compound # | Aromagram # | ABC box | TIC RT (min) | AG RT (min) | Compound                  | CAS        | Published ODT (ppm)      |                   | Published Descriptors     |                        |           |                       |          |
|------------|-------------|---------|--------------|-------------|---------------------------|------------|--------------------------|-------------------|---------------------------|------------------------|-----------|-----------------------|----------|
|            |             |         |              |             |                           |            | LRI & Odour Database [1] | Devos, et al. [2] | Odor Descriptor           | Flavornet [3]          | TGSC [4]  | Surrogate Conc. (PAC) | OAV      |
| 89         | B           |         | 15.85        |             | Decanal                   | 112-31-2   | 2.00E-03                 | 8.91E-04          | Soap, Orange peel, Tallow | Aldehydic              |           | 8.90E+05              | 9.99E+08 |
| 90         | B           |         | 15.86#       |             | 1-hexadecanol             | 36653-82-4 |                          |                   | Flower, Wax               | Wax                    |           | 8.06E+05              |          |
| 91         | 30          | A       | 15.90#       | 15.90       | o-guaiacol                | 90-05-1    |                          | 1.00E-03          | Medicinal, Herbaceous     | Smoke, Sweet, Medicine | Phenolic  | 9.69E+04              | 9.69E+07 |
| 92         | 31          | A       | 16.20        | 16.18       | 5-octanolide              | 698-76-0   |                          |                   | Soapy, Citrus, Mint       | Peach                  | Coconut   | 6.27E+04              |          |
| 93         | B           |         | 16.23        |             | Methyl benzoate           | 93-58-3    |                          | 1.07E-01          | Prune, Herb, Sweet        | Lettuce, Phenolic      |           | 8.95E+05              | 8.35E+06 |
| 94         | B           |         | 16.32#       |             | Tridecane                 | 629-50-5   |                          | 2.14E+00          | Alkane                    | Alkane                 |           | 4.28E+04              | 2.00E+04 |
| 95         | B           |         | 16.35        |             | Propanoic acid, anhydride | 123-62-6   |                          |                   |                           |                        |           | 8.37E+03              |          |
| 96         | B           |         | 16.48        |             | 3-ethyltoluene            | 620-14-4   |                          |                   |                           |                        |           | 8.56E+04              |          |
| 97         | B           |         | 16.48        |             | p-ethyl toluene           | 622-96-8   |                          |                   |                           |                        |           | 8.56E+04              |          |
| 98         | B           |         | 16.48        |             | 2-ethyltoluene            | 611-14-3   |                          |                   |                           |                        |           | 7.88E+04              |          |
| 99         | B           |         | 16.50        |             | Cumene                    | 98-82-8    |                          | 2.40E-02          |                           |                        |           | 1.18E+05              | 4.93E+06 |
| 100        | B           |         | 16.50#       |             | Acetophenone              | 98-86-2    | 6.50E-02                 | 3.63E-01          | Musty, Almond             | Flower, Floral         |           | 1.18E+05              | 3.25E+05 |
| 101        | 32          | A       | 16.50        | 16.50       | Isobutyrophenone          | 611-70-1   |                          |                   | Herbaceous, Medicinal     |                        | Green     | 8.91E+04              |          |
| 102        | B           |         | 16.63        |             | Anethole                  | 104-46-1   |                          | 7.08E-03          |                           |                        | Licorice  | 3.24E+05              | 4.58E+07 |
| 103        | B           |         | 16.63        |             | Estragole                 | 140-67-0   |                          |                   |                           | Licorice, Anise        | Anise     | 3.24E+05              |          |
| 104        | B           |         | 16.64        |             | Cuminaldehyde             | 122-03-2   |                          |                   | Acid, Sharp               | Spicy                  |           | 3.97E+05              |          |
| 105        | B           |         | 16.64        |             | Pentamethylbenzene        | 700-12-9   |                          |                   |                           |                        |           | 3.97E+05              |          |
| 106        | B           |         | 16.65        |             | Benzphetamine             | 156-08-1   |                          |                   |                           |                        |           | 2.82E+05              |          |
| 107        | B           |         | 16.65        |             | 3-isopropylbenzaldehyde   | 34246-57-6 |                          |                   |                           |                        |           | 3.50E+05              |          |
| 108        | B           |         | 16.80        |             | Salicylaldehyde           | 90-02-8    |                          | 7.41E-03          |                           |                        | Medicinal | 1.72E+05              | 2.32E+07 |
| 109        | B           |         | 17.10        |             | Betazole                  | 105-20-4   |                          |                   |                           |                        |           | 9.35E+04              |          |
| 110        | B           |         | 17.10        |             | 2-methyl-1H-imidazole     | 693-98-1   |                          |                   |                           |                        |           | 9.35E+04              |          |

| Compound # | Aromagram # | ABC box | TIC RT (min) | AG RT (min) | Compound                                          | CAS       | Published ODT (ppm)      |                   | Published Descriptors |                          |          |                       |          |          |
|------------|-------------|---------|--------------|-------------|---------------------------------------------------|-----------|--------------------------|-------------------|-----------------------|--------------------------|----------|-----------------------|----------|----------|
|            |             |         |              |             |                                                   |           | LRI & Odour Database [1] | Devos, et al. [2] | Odor Descriptor       | Flavornet [3]            | TGSC [4] | Surrogate Conc. (PAC) | OAV      |          |
| 33         | C           |         |              | 17.16       |                                                   |           |                          |                   | Skunky, Sewer         |                          |          |                       |          |          |
| 111        | B           |         | 17.19        |             | $\gamma$ -hexalactone                             | 695-06-7  |                          |                   |                       | Coumarin, Sweet          | Tonka    |                       | 2.53E+05 |          |
| 112        | 34          | A       | 17.41#       | 17.40       | Piperidine                                        | 110-89-4  |                          | 3.72E-01          | Moldy, Burnt food     |                          | Animal   |                       | 2.28E+05 | 6.13E+05 |
| 113        | B           |         | 17.41        |             | 3-methylheptane                                   | 589-81-1  |                          |                   |                       |                          |          |                       | 1.22E+05 |          |
| 114        | B           |         | 17.72        |             | Isobornyl acetate                                 | 125-12-2  |                          |                   |                       |                          | Balsamic |                       | 1.22E+06 |          |
| 115        | B           |         | 17.73#       |             | $\alpha$ -terpineol                               | 98-55-5   |                          | 3.72E-02          |                       | Oil, Anise, Mint         | Floral   |                       | 1.47E+06 | 3.95E+07 |
| 116        | B           |         | 17.73        |             | Isobornyl thiocynoacetate                         | 115-31-1  |                          |                   |                       |                          |          |                       | 1.03E+06 |          |
| 117        | B           |         | 17.76        |             | Hexadecane                                        | 544-76-3  |                          |                   |                       | Alkane                   |          |                       | 1.30E+05 |          |
| 118        | B           |         | 17.76#       |             | Pentadecane                                       | 629-62-9  |                          |                   |                       | Alkane                   | Waxy     |                       | 1.30E+05 |          |
|            | 35          | C       |              | 17.82       |                                                   |           |                          |                   |                       | Citrus, Herbaceous       |          |                       |          |          |
| 119        | B           |         | 17.84        |             | Nitrobenzene                                      | 98-95-3   |                          | 4.37E-02          |                       |                          |          |                       | 3.81E+05 | 8.73E+06 |
|            | 36          | C       |              | 18.01       |                                                   |           |                          |                   |                       | Moldy, Burnt food, Burnt |          |                       |          |          |
| 120        | B           |         | 18.04        |             | p-acetanisole                                     | 100-06-1  |                          |                   |                       |                          | Anisic   |                       | 5.79E+04 |          |
| 121        | B           |         | 18.04        |             | 3-methyl-5-(1-methylethyl)-Phenol methylcarbamate | 2631-37-0 |                          |                   |                       |                          |          |                       | 5.79E+04 |          |
| 122        | B           |         | 18.04#       |             | Carvacrol                                         | 499-75-2  |                          | 1.12E-02          |                       |                          | Spicy    |                       | 5.79E+04 | 5.16E+06 |
| 123        | B           |         | 18.04        |             | Thymol                                            | 89-83-8   |                          | 1.55E-02          |                       |                          | Herbal   |                       | 5.79E+04 | 3.74E+06 |
| 124        | B           |         | 18.05        |             | m-tert-butylphenol                                | 585-34-2  |                          |                   |                       |                          |          |                       | 7.57E+04 |          |
| 125        | B           |         | 18.13        |             | $\alpha$ -methylcinnamaldehyde                    | 101-39-3  |                          |                   |                       |                          | Spicy    |                       | 3.89E+05 |          |
|            | 37          | C       |              | 18.37       |                                                   |           |                          |                   |                       | Herbaceous, Medicinal    |          |                       |          |          |



| Compound # | Aromagram # | ABC box | TIC RT (min) | AG RT (min) | Compound                    | CAS        | Published ODT (ppm)      |                   | Published Descriptors             |               |          | Surrogate Conc. (PAC) | OAV      |
|------------|-------------|---------|--------------|-------------|-----------------------------|------------|--------------------------|-------------------|-----------------------------------|---------------|----------|-----------------------|----------|
|            |             |         |              |             |                             |            | LRI & Odour Database [1] | Devos, et al. [2] | Odor Descriptor                   | Flavornet [3] | TGSC [4] |                       |          |
| 126        | B           |         | 18.47        |             | $\alpha$ -cubebene          | 17699-14-8 |                          |                   | Herb, Wax                         | Herb          |          | 3.21E+05              |          |
| 127        | B           |         | 18.73        |             | p-aminotoluene              | 106-49-0   |                          |                   |                                   |               |          | 1.57E+03              |          |
| 128        | B           |         | 18.80        |             | 1-(3-methylphenyl)-ethanone | 585-74-0   |                          |                   |                                   |               |          | 1.25E+05              |          |
| 129        | B           |         | 18.87#       |             | Methyl salicylate           | 119-36-8   | 4.00E-02                 | 4.37E-02          | Peppermint                        | Minty         |          | 1.08E+05              | 2.48E+06 |
| 130        | B           |         | 19.01        |             | Hexanoic acid, propyl ester | 626-77-7   |                          |                   | Fruity                            | Fruity        |          | 2.41E+05              |          |
| 131        | B           |         | 19.09        |             | (+)-sativene                | 3650-28-0  |                          |                   |                                   |               |          | 8.09E+05              |          |
| 132        | B           |         | 19.35        |             | $\alpha$ -longipinene       | 5989-08-2  |                          |                   |                                   |               |          | 5.69E+05              |          |
| 133        | B           |         | 19.50        |             | Perillaldehyde              | 2111-75-3  |                          |                   | Spice                             | Herbal        |          | 2.10E+05              |          |
| 134        | B           |         | 19.51        |             | (-)-Aristolene              | 6831-16-9  |                          |                   |                                   |               |          | 2.61E+05              |          |
| 135        | B           |         | 19.69        |             | $\beta$ -caryophyllene      | 87-44-5    | 6.40E-02                 |                   | Wood, Spice                       | Spice         |          | 3.85E+07              |          |
|            | 38          | C       |              | 19.83       |                             |            |                          |                   | Burnt food, Burnt, Piggy, Urinous |               |          |                       |          |
| 136        | B           |         | 19.85        |             | $\alpha$ -guaiene           | 3691-12-1  |                          |                   | Wood, Balsamic                    | Wood          |          | 1.68E+06              |          |
| 137        | B           |         | 19.96        |             | $\alpha$ -bulnescene        | 3691-11-0  |                          |                   |                                   |               |          | 1.74E+06              |          |
|            | 39          | C       |              | 20.20       |                             |            |                          |                   | Herbaceous, Smoky                 |               |          |                       |          |
| 138        | 40          | A       | 20.29#       | 20.29       | $\beta$ -cedrene            | 546-28-1   |                          |                   | Herbaceous, Citrus                |               |          | 2.34E+06              |          |
| 139        | B           |         | 20.30        |             | (+)-nerolidol               | 142-50-7   |                          |                   |                                   | Floral        |          | 4.48E+06              |          |
| 140        | B           |         | 20.43        |             | 2-methyl naphthalene        | 91-57-6    |                          |                   |                                   | Floral        |          | 6.13E+04              |          |
| 141        | B           |         | 20.54        |             | $\alpha$ -humulene          | 6753-98-6  | 1.20E-01                 |                   | Wood                              | Wood          |          | 1.23E+07              |          |
| 142        | B           |         | 20.68        |             | Benzyl nitrile              | 140-29-4   |                          |                   |                                   |               |          | 2.36E+05              |          |
|            | 41          | C       |              | 20.73       |                             |            |                          |                   | Herbaceous, Citrus, Resiny        |               |          |                       |          |
| 143        | B           |         | 20.89        |             | $\alpha$ -copaene           | 3856-25-5  |                          |                   | Wood, Spice                       | Wood          |          | 4.93E+05              |          |
|            | 42          | C       |              | 21.12       |                             |            |                          |                   | Moldy                             |               |          |                       |          |

| Compound # | Aromagram # | ABC box | TIC RT (min) | AG RT (min) | Compound              | CAS        | Published ODT (ppm)      |                   | Published Descriptors                                         |                       |          | Surrogate Conc. (PAC) | OAV      |
|------------|-------------|---------|--------------|-------------|-----------------------|------------|--------------------------|-------------------|---------------------------------------------------------------|-----------------------|----------|-----------------------|----------|
|            |             |         |              |             |                       |            | LRI & Odour Database [1] | Devos, et al. [2] | Odor Descriptor                                               | Flavornet [3]         | TGSC [4] |                       |          |
| 144        | 43          | A       | 21.26        | 21.24       | $\beta$ -selinene     | 17066-67-0 |                          |                   | Sweet, Fruity                                                 | Herb                  | Herb     | 6.06E+06              |          |
| 145        |             | B       | 21.27        |             | (+)-calarene          | 17334-55-3 |                          |                   |                                                               |                       |          | 1.53E+06              |          |
| 146        |             | B       | 21.41        |             | Aromadendrene         | 489-39-4   |                          |                   |                                                               | Wood                  | Wood     | 5.15E+06              |          |
| 147        |             | B       | 21.64#       |             | Phenol                | 108-95-2   |                          | 1.10E-01          |                                                               | Phenolic              | Phenolic | 1.95E+05              | 1.78E+06 |
| 148        |             | B       | 21.69        |             | Dyclocaine            | 586-60-7   |                          |                   |                                                               |                       |          | 2.91E+06              |          |
| 149        |             | B       | 21.70        |             | Cedryl acetate        | 77-54-3    |                          |                   |                                                               |                       | Wood     | 4.85E+05              |          |
| 150        |             | B       | 21.77        |             | $\delta$ -cadinene    | 483-76-1   |                          |                   |                                                               | Thyme, Medicine, Wood | Herbal   | 7.00E+06              |          |
| 151        |             | B       | 21.77        |             | $\alpha$ -gurjunene   | 489-40-7   |                          |                   |                                                               | Wood, Balsamic        | Wood     | 5.25E+06              |          |
|            | 44          | C       |              | 21.91       |                       |            |                          |                   | Herbaceous, Resiny                                            |                       |          |                       |          |
| 152        |             | B       | 22.08        |             | Longifolene           | 475-20-7   |                          |                   |                                                               |                       | Wood     | 1.43E+06              |          |
|            | 45          | C       |              | 22.13       |                       |            |                          |                   | Gasoline, Solvent                                             |                       |          |                       |          |
| 153        |             | B       | 22.22        |             | Valencene             | 4630-07-3  |                          |                   |                                                               | Green, Oil            | Citrus   | 2.28E+07              |          |
| 154        |             | B       | 22.77        |             | $\gamma$ -gurjunene   | 22567-17-5 |                          |                   |                                                               |                       | Musty    | 3.25E+06              |          |
| 155        |             | B       | 22.77        |             | $\alpha$ -cadinene    | 24406-05-1 |                          |                   |                                                               |                       | Wood     | 6.61E+06              |          |
| 156        | 46          | A       | 22.78        | 22.79       | Alloaromadendrene     | 25246-27-9 |                          |                   | Herbaceous, Resiny, Medicinal, Characteristic, Piggy, Urinous | Wood                  | Wood     | 4.05E+06              |          |
| 157        |             | B       | 23.14        |             | 2,6-dimethylquinoline | 877-43-0   |                          |                   |                                                               |                       |          | 9.79E+05              |          |
| 158        |             | B       | 23.23        |             | Tetrahydrozoline      | 84-22-0    |                          |                   |                                                               |                       |          | 7.06E+05              |          |
| 159        |             | B       | 23.98        |             | Propofol              | 2078-54-8  |                          |                   |                                                               |                       | Phenolic | 1.80E+07              |          |
| 160        |             | B       | 23.98        |             | Methyl isoeugenol     | 93-16-3    |                          |                   |                                                               | Clove, Spice          | Spice    | 1.80E+07              |          |
| 161        |             | B       | 24.34        |             | Isoeugenol            | 97-54-1    |                          |                   |                                                               | Flower                | Spicy    | 3.41E+05              |          |

| Compound # | Aromagram # | ABC box | TIC RT (min) | AG RT (min) | Compound                                           | CAS        | Published ODT (ppm)      |                   | Published Descriptors                          |               |          | Surrogate Conc. (PAC) | OAV      |
|------------|-------------|---------|--------------|-------------|----------------------------------------------------|------------|--------------------------|-------------------|------------------------------------------------|---------------|----------|-----------------------|----------|
|            |             |         |              |             |                                                    |            | LRI & Odour Database [1] | Devos, et al. [2] | Odor Descriptor                                | Flavornet [3] | TGSC [4] |                       |          |
| 162        | B           |         | 24.34        |             | Eugenyl acetate                                    | 93-28-7    |                          |                   |                                                |               | Spicy    | 2.06E+05              |          |
| 163        | B           |         | 24.35        |             | Carbofuran                                         | 1563-66-2  |                          |                   |                                                |               |          | 1.16E+05              |          |
| 164        | B           |         | 24.35        |             | Eugenol                                            | 97-53-0    |                          | 1.07E-02          | Clove, Honey                                   | Spicy         |          | 1.16E+05              | 1.08E+07 |
| 165        | B           |         | 24.51        |             | 3-(3-hydroxyphenyl)-2-propenoic acid, methyl ester | 3943-95-1  |                          |                   |                                                |               |          | 5.39E+04              |          |
|            | 47          | C       |              | 24.64       |                                                    |            |                          |                   | Medicinal, Herbaceous, Resiny                  |               |          |                       |          |
| 166        | B           |         | 24.72        |             | Citronellyl acetate                                | 150-84-5   |                          |                   | Rose, Dust                                     | Floral        |          | 2.78E+05              |          |
|            | 48          | C       |              | 25.07       |                                                    |            |                          |                   | Piggy, Urinous, Barnyard                       |               |          |                       |          |
| 167        | B           |         | 25.23        |             | Methyl anthranilate                                | 134-20-3   |                          | 1.15E-03          | Honey, Flower                                  | Fruity        |          | 1.04E+05              | 9.04E+07 |
| 168        | B           |         | 26.36        |             | $\beta$ -irone                                     | 79-70-9    |                          |                   |                                                | Floral        |          | 2.15E+05              |          |
| 169        | B           |         | 26.36        |             | 2,4-di-tert-butylphenol                            | 96-76-4    |                          |                   |                                                | Phenolic      |          | 1.44E+05              |          |
| 170        | B           |         | 26.42        |             | $\alpha$ -bisabolol                                | 72691-24-8 |                          |                   |                                                |               |          | 1.24E+05              |          |
|            | 49          | C       |              | 26.53       |                                                    |            |                          |                   | Piggy, Barnyard, Urinous                       |               |          |                       |          |
| 171        | B           |         | 26.96        |             | 7-methoxycoumarin                                  | 531-59-9   |                          |                   | Balsamic, Sweet                                | Balsamic      |          | 3.15E+05              |          |
| 172        | 50          | A       | 27.62        | 27.63       | Piperonal                                          | 120-57-0   |                          | 4.79E-03          | Potato, Resiny                                 | Floral        |          | 6.10E+03              | 1.28E+06 |
| 173        | B           |         | 27.86        |             | Caryophyllene oxide                                | 1139-30-6  |                          |                   | Herb, Sweet, Spice                             | Woody         |          | 1.74E+07              |          |
|            | 51          | C       |              | 27.98       |                                                    |            |                          |                   | Resiny, Potato, Roasted, <b>Characteristic</b> |               |          |                       |          |

| Compound # | Aromagram # | ABC box | TIC RT (min) | AG RT (min) | Compound                | CAS        | Published ODT (ppm)      |                   | Published Descriptors |               |                 | Surrogate Conc. (PAC) | OAV      |  |
|------------|-------------|---------|--------------|-------------|-------------------------|------------|--------------------------|-------------------|-----------------------|---------------|-----------------|-----------------------|----------|--|
|            |             |         |              |             |                         |            | LRI & Odour Database [1] | Devos, et al. [2] | Odor Descriptor       | Flavornet [3] | TGSC [4]        |                       |          |  |
| 52         | C           |         |              | 29.22       |                         |            |                          |                   |                       |               |                 |                       |          |  |
| 174        | B           |         | 29.83        |             | 4-ethoxy-3-anisaldehyde | 120-25-2   |                          |                   |                       |               | Vanilla         |                       | 4.86E+04 |  |
| 175        | 53          | A       | 30.46        | 30.47       | Dibutyl phthalate       | 84-74-2    |                          |                   | Potato, Resiny        |               | Bland           |                       | 1.61E+04 |  |
| 176        | B           |         | 31.47        |             | Hexestrol               | 84-16-2    |                          |                   |                       |               |                 |                       | 1.11E+06 |  |
| 177        | B           |         | 31.49        |             | p-tert-butylphenol      | 98-54-4    |                          |                   |                       |               | Leathery        |                       | 5.84E+05 |  |
| 178        | B           |         | 31.79        |             | 2,6-diethylpyrazine     | 13067-27-1 | 6.00E-03                 |                   |                       |               | Nutty, Hazelnut |                       | 1.96E+05 |  |

Compound # refers to the chronological order of compounds eluted off the analytical GC column; Aromagram # refers to the chronological aromagram peak order (Fig. 2). Odor descriptor refers to descriptions used by panelists in this study. Surrogate Conc. is MS response to each separated compound, in peak area counts (PAC) (i.e., the integrated area under the curve of each chromatographic peak), OAV=Odor Activity Value (ratio of surrogate concentration to odor detection threshold). # indicates compounds confirmed by pure standard for mass spectral and retention time. [1] Mottram R. LRI & Odour Database [Internet]. UK: University of Reading; [2006; cited 2014 August 08]. Available from: [www.odour.org.uk/index.html](http://www.odour.org.uk/index.html) [2] Devos M, Patte F, Rouault J, Laffort P, Van Gemert LJ, editors. Standardized Human Olfactory Thresholds. IRL Press at Oxford Press; 1990. [3] Acree TE, Arn H. Flavornet and human odor space [Internet]. Geneva, NY: Cornell University; [2004; cited 2014 August 08]. Available from: <http://flavornet.org/flavornet.html> [4] The Good Scents Company Information System [Internet]. Oak Creek, WI; [1994; cited 2014 August 08]. Available from: <http://www.thegoodscentscompany.com/index.html#> All ODTs presented in this table are human olfactory thresholds in air.
